# Supplementary material for: Potentially avoidable hospitalisations of German nursing home patients? A cross-sectional study on utilisation patterns and potential consequences for healthcare
Source: PubMed Central journal article supplement — BMJ Open. 2019 Jan 21;9(1):e025269. doi: 10.1136/bmjopen-2018-025269 (PMC6347959; doi:10.1136/bmjopen-2018-025269), 2019-01-21
Supplement: bmjopen-2018-025269.draft_revisions.pdf [file bmjopen-2018-025269.draft_revisions.pdf]

# BMJ Open

BMJ Open is committed to open peer review. As part of this commitment we make the peer review history of every article we publish publicly available.

When an article is published we post the peer reviewers' comments and the authors' responses online. We also post the versions of the paper that were used during peer review. These are the versions that the peer review comments apply to.

The versions of the paper that follow are the versions that were submitted during the peer review process. They are not the versions of record or the final published versions. They should not be cited or distributed as the published version of this manuscript.

BMJ Open is an open access journal and the full, final, typeset and author-corrected version of record of the manuscript is available on our site with no access controls, subscription charges or pay-per-view fees (<http://bmjopen.bmj.com>).

If you have any questions on BMJ Open's open peer review process please email [info.bmjopen@bmj.com](mailto:info.bmjopen@bmj.com)

# BMJ Open

## Potentially avoidable Hospitalisations of German Nursing Home Patients: Utilisation-Patterns and Consequences

|                               |                                                                                                                                                                                                                                                                                                                                                                                                         |
|-------------------------------|---------------------------------------------------------------------------------------------------------------------------------------------------------------------------------------------------------------------------------------------------------------------------------------------------------------------------------------------------------------------------------------------------------|
| Journal:                      | <i>BMJ Open</i>                                                                                                                                                                                                                                                                                                                                                                                         |
| Manuscript ID                 | bmjopen-2018-025269                                                                                                                                                                                                                                                                                                                                                                                     |
| Article Type:                 | Research                                                                                                                                                                                                                                                                                                                                                                                                |
| Date Submitted by the Author: | 11-Jul-2018                                                                                                                                                                                                                                                                                                                                                                                             |
| Complete List of Authors:     | Leutgeb, Rüdiger; UniversitätsKlinikum Heidelberg, General Practice and Health Services Research<br>Berger, Sarah; UniversitätsKlinikum Heidelberg, General Practice and Health Services Research<br>Szecsenyi, Joachim; UniversitätsKlinikum Heidelberg, General Practice and Health Services Research<br>Laux, Gunter; UniversitätsKlinikum Heidelberg, General Practice and Health Services Research |
| Keywords:                     | PRIMARY CARE, GERIATRIC MEDICINE, Human resource management < HEALTH SERVICES ADMINISTRATION & MANAGEMENT, Quality in health care < HEALTH SERVICES ADMINISTRATION & MANAGEMENT                                                                                                                                                                                                                         |
|                               |                                                                                                                                                                                                                                                                                                                                                                                                         |

SCHOLARONE™  
Manuscripts

1  
2  
3  
4  
5  
6  
7  
8  
9  
10  
11  
12  
13  
14  
15  
16  
17  
18  
19  
20  
21  
22  
23  
24  
25  
26  
27  
28  
29  
30  
31  
32  
33  
34  
35  
36  
37  
38  
39  
40  
41  
42  
43  
44  
45  
46  
47  
48  
49  
50  
51  
52  
53  
54  
55  
56  
57  
58  
59  
60

1 **Potentially avoidable Hospitalisations of German Nursing Home Patients: Utilisation-**  
2 **Patterns and Consequences**

3 Rüdiger Leutgeb<sup>1</sup>, Sarah Berger<sup>1</sup>, Joachim Szecsenyi<sup>1</sup>, Gunter Laux<sup>1</sup>.

4  
5 <sup>1</sup>*Department of General Practice and Health Services Research, University Hospital Heidelberg, Marsilius-*  
6 *Arcades, Im Neuenheimer Feld 130.3, 69120 Heidelberg, Germany.*

8 **Correspondence to** Ruediger Leutgeb MD; [ruediger.leutgeb@med.uni-heidelberg.de](mailto:ruediger.leutgeb@med.uni-heidelberg.de)

9 **Word Count** 3,073

For peer review only

1  
2  
3 **Abstract**  
4

5  
6 **Objectives** Demand for nursing home (NH) care is soaring due to gains in life expectancy  
7  
8 and people living longer with chronic illness and disability. This is dovetailing with work-  
9  
10 force shortages across the health professions. Access to timely and appropriate medical  
11  
12 care for NH residents is becoming increasingly challenging and can result in potentially  
13  
14 avoidable hospitalisations (PAHs). In light of these factors, we analyzed PAHs comparing  
15  
16 NH patients with Non-NH patients.

17 **Design** Cross-sectional study with claims data from 2015 supplied by a large German  
18  
19 health insurance company within the federal state of Baden-Wuerttemberg.

20 **Setting** One year observation of hospitalisation patterns for NH and Non-NH patients.

21 **Participants** 3,872,245 of the 10.5 Million inhabitants of Baden-Wuerttemberg were  
22  
23 covered.

24 **Methods** Patient data about hospitalisation date, sex, age, level of care and diagnoses  
25  
26 were available. PAHs were defined based on ICD-10 diagnoses belonging to Ambulatory  
27  
28 Care Sensitive Conditions (ACSCs). Adjusted odds ratios for PAHs for NH patients in  
29  
30 comparison to Non-NH patients were calculated with multivariable regression models.

31 **Results** Of the 933,242 hospitalisations in 2015, there were 23,982 for 13,478 NH pa-  
32  
33 tients and 909,260 for 560,998 Non-NH patients. Mean age of hospitalised NH patients  
34  
35 and level of care were significantly higher than those of Non-NH patients. 6,449 PAHs  
36  
37 (29.6%) for NH patients and 136,543 PAHs (15.02%) for Non-NH patients were identi-  
38  
39 fied. The adjusted odds ratio for PAHs was significantly heightened for NH patients in  
40  
41 comparison to Non-NH patients (OR: 1.22, CI:[1.18, 1.26],  $p < 0.0001$ ). Moreover, we  
42  
43 could observe that more than 90% of PAHs with ACSCs were unplanned.  
44  
45  
46  
47  
48  
49  
50  
51  
52  
53  
54  
55  
56  
57  
58  
59  
60

1  
2  
3 33 **Conclusions** Large numbers of PAHs for NH patients calls for improved coordination of  
4  
5 34 medical care, especially GP service provision. Introduction of targeted training programs  
6  
7 35 for physicians and NH staff on health problem management for NH patients can con-  
8  
9 36 tribute to reduction of potentially avoidable hospital admissions.

11  
12  
13 37 **Strengths and limitations of this study**

- 14  
15 38 • The evaluation reports on a comprehensive sample of data of one year covering  
16 39 one whole federal state of Germany.  
17 40 • This is the first study comparing potentially avoidable hospitalisations of nursing  
18 41 home residents with people living at home.  
19 42 • It was possible to separate planned from unplanned hospitalisations.  
20 43 • The assessment of concept of “potentially avoidable hospitalisations” depends  
21 44 on the specific context of each case.  
22 45 • The real need for long time care could only be approximated by the level of care  
23 46 in the data set.

24  
25  
26 47  
27  
28  
29 48 **Keywords** Nursing Homes; potentially avoidable hospitalisations; unplanned hospitalisa-  
30  
31 49 tions; Ambulatory Care-Sensitive Conditions; Out-of-Hours Care.  
32  
33

34  
35 50

36  
37 51  
38  
39  
40  
41  
42  
43  
44  
45  
46  
47  
48  
49  
50  
51  
52  
53  
54  
55  
56  
57  
58  
59  
60

## 52 **Background**

53 Demand for nursing home (NH) care is soaring due to gains in life expectancy and peo-  
54 ple living longer with chronic illness and disability. In Germany between 2013 and 2015  
55 the number of nursing increased by 4.6%. In 2015, a number of 783,000 nursing home  
56 residents was observed. This is comparable with the situation in France. However, ac-  
57 cess to timely and appropriate medical care for NH residents is becoming increasingly  
58 challenging with frequency of home visits to nursing home residents rising in both regu-  
59 lar and Out-of-Hours care (OOHC).<sup>1-4</sup> Provision of medical care to nursing home resi-  
60 dents in Germany is predominantly provided by general practitioners (GPs), but this in-  
61 creasing demand for health care services is dovetailing with workforce shortages across  
62 the health professions including general practitioners. This is leading to gaps in care pro-  
63 vision for NH-residents and an increasing burden in terms of workload for GPs, especial-  
64 ly in rural areas.<sup>4,5</sup>

65 This is exacerbated by a further problem in terms of the knowledge base and skill sets of  
66 nursing staff traditionally educated to work in German nursing homes (*Altenpflege*).  
67 Laws governing the curriculum, i.e. required theoretical content and hours plus required  
68 clinical practice hours for the three-year *Altenpflege* vocational nursing training, have  
69 not been updated since 2003, but in the subsequent 15-years, care needs of nursing  
70 home residents have become increasingly more complex as people live longer with  
71 chronic illness and co-morbidities.<sup>6</sup> There is a distinct need for upskilling and expansion  
72 of the roles and responsibilities of nursing staff working in German nursing homes.  
73 Workforce shortages in this occupational group as well as lacking competencies result in  
74 an increased burden to nurses and contribute to potentially avoidable hospitalisations.<sup>7-</sup>

75 <sup>9</sup> Meanwhile, nursing home residents experience the consequences of these system is-

1  
2  
3 76 sues at an individual level including discomfort to themselves, potentially increased risk  
4  
5 77 of morbidity due to iatrogenic events, potential deterioration of dementia or delirious  
6  
7 78 behaviors not to mention the financial implications related to potentially avoidable hos-  
8  
9 79 pitalisations.<sup>10</sup>

11  
12 80 NHs residents have been associated with high rates of emergency department (ED) visits  
13  
14 81 and a high rate of hospitalisations, which is not just a problem in the German health  
15  
16 82 care system. Several international studies point in the direction that a large number  
17  
18 83 hospitalisations for NH-residents are potentially hasty.<sup>10-14</sup> Common conditions of nurs-  
19  
20 84 ing home residents presenting to ED are pneumonia, falls with injuries, urinary tract  
21  
22 85 infections, dehydration, partly as part of digestive problems often combined with pre-  
23  
24 86 existing dementia.<sup>15-18</sup> These all fall under the umbrella of ‘ambulatory care-sensitive  
25  
26 87 conditions’ (ACSCs), which in the ICD-10 codes include the most prevalent conditions for  
27  
28 88 hospitalisations, which could potentially be handled on an outpatient basis.<sup>19</sup>

29  
30  
31  
32  
33  
34 89 The aim of this study was to identify potentially avoidable hospitalisations (PAHs) of pa-  
35  
36 90 tients living in NHs and to compare these hospitalisations rates with the PAH rates of  
37  
38 91 patients living at home. We distinguished between planned and unplanned hospitalisa-  
39  
40 92 tions (UHs). Our hypothesis was that the rate of PAHs from NHs would be significantly  
41  
42 93 higher than of patients living at home.

## 44 45 46 94 **Methods**

### 47 48 49 95 *Setting, Design and Participants*

50  
51  
52 96 Inpatient diagnoses of insured individuals living at home and of residents living in nurs-  
53  
54 97 ing homes supplied by the AOK (“Allgemeine Ortskrankenkasse”), a statutory health  
55  
56 98 insurance company within the Federal State Baden-Wuerttemberg were analysed in

1  
2  
3 99 order to determine PAHs. All inpatient ICD-10 diagnoses in 2015 were screened for an  
4  
5 100 established set of ACSCs compiled by health services researchers of the Department of  
6  
7 101 General Practice and Health Services Research, University Hospital Heidelberg according  
8  
9 102 to already published lists of ACSCs.<sup>19-21</sup> The included conditions are shown in the Sup-  
10  
11 103 plemental Table 1.

14  
15 104 Data were derived from a comprehensive evaluation programme in German primary  
16  
17 105 care, the *Hausarztzentrierte Versorgung* (HZV), loosely translated as “family doctor co-  
18  
19 106 ordinated care”. The HZV is a programme encouraging patients to enrol with a family  
20  
21 107 doctor pursuant to Section 73b, Volume V of the German Social Security Law. It came  
22  
23 108 into effect in Baden-Wuerttemberg on July 1st, 2008. The HZV is aimed at enhancing  
24  
25 109 health care for patients with chronic diseases and complex health care needs e. g. those  
26  
27 110 requiring long-term care.<sup>22</sup>

30  
31 111 In Germany, the rules for determining level of care for all patients depend on the severi-  
32  
33 112 ty of disease and multi-morbidity. The level of care category assigned then determines  
34  
35 113 the financial support available for continuous care from the health care insurance pro-  
36  
37 114 viders.<sup>23</sup> Until 2016, patients could be categorised into one of four levels of care from 0  
38  
39 115 to 3. These levels include assessed needs for both basic nursing care and specialised  
40  
41 116 medical care. For example, patients who required basic nursing care of less than 0.75  
42  
43 117 hours per day were categorised in level 0, patients who needed more than four hours  
44  
45 118 basic nursing care per day and additionally required complex medical care were catego-  
46  
47 119 rised in level 3. Since 2017, the level of care categories have been extended from 0 to 5  
48  
49 120 in order to include patients with incipient and advanced dementia who are otherwise  
50  
51 121 physically healthy.<sup>24</sup>



1  
2  
3 122 The items of the level of care classification in Germany may be approximately compara-  
4  
5 123 ble with the key issues of the management of people with long term conditions in Eng-  
6  
7 124 land of Goodwin et al. describing five vital areas of long-term conditions (LTCs) and the  
8  
9 125 social care long term conditions model with quality requirements. The effectivity of the  
10  
11 126 new care models are currently examined and evaluated in different vanguards spread  
12  
13  
14 127 across England.<sup>25-27</sup>

### 17 128 *Data*

19  
20 129 The eligible study population consisted of 3.872 million individuals with statutory health  
21  
22 130 insurance from AOK. The insurance claims data included diagnosis, date of hospitalisa-  
23  
24 131 tion, age and sex of the individuals and planned or unplanned hospitalisations. An un-  
25  
26 132 planned or emergency case could be identified in the forms of hospitalisation recorded  
27  
28 133 in the available dataset by the health insurance company. Age and gender was available  
29  
30 134 for every patient within the dataset. Based on the ICD-10, it was possible to determine  
31  
32 135 the “Charlson-Index” in order to approximate patients’ overall morbidity. There are par-  
33  
34 136 ticular diagnoses corresponding to more severe conditions. Values between 1 and 6 are  
35  
36 137 assigned for those diagnoses. Finally, a sum score is determined for each individual. The  
37  
38 138 underlying calculus is described in detail elsewhere.<sup>28</sup>

39  
40  
41  
42  
43 139 Data storage and extraction was performed with MySQL Community Server x64 (Oracle  
44  
45 140 Corporation, Redwood Shores, CA, USA).

### 48 141 *Statistical Methods*

49  
50  
51 142 Multivariable analyses were performed with regard to patients’ age, gender, morbidity  
52  
53 143 and the binary variable for participation in the HZV intervention. Moreover, level of care  
54  
55 144 for each patient in the multivariable model was included.

1  
2  
3 145 In order to calculate frequencies, rates and percentages we used SAS PROC SQL. In order  
4  
5 146 to assess the adjusted outcomes of interest, we used SAS PROC GENMOD (SAS 9.4 x64,  
6  
7 147 SAS Institute Inc., Cary, NC, USA).<sup>29</sup>  
8  
9

10 148 For all analyses, results were considered statistically significant if the p value was 0.05 or  
11  
12 149 less.  
13  
14

### 15 150 *Outcomes*

16  
17  
18 151 Potentially avoidable hospitalisations of individuals living at home and of individuals  
19  
20 152 living in nursing homes were the primary outcome measures in this study. The compari-  
21  
22 153 son of planned and unplanned hospitalisations was an additional outcome.  
23  
24

### 25 154 *Ethics*

26  
27  
28 155 Ethical approval for the study was given by the University Hospital Heidelberg Ethics  
29  
30 156 Committee (No. S-359/2013).  
31  
32

### 33 157 *Patient and public involvement*

34  
35  
36 158 Patients of the study could not be informed and involved because we used pseudony-  
37  
38 159 mized data. It was not possible to identify patients. The dissemination of the results will  
39  
40 160 be performed by publications publicly accessible.  
41  
42  
43

44 161

## 45 162 **Results**

### 46 163 *Observed Sample*

47  
48 164 The sample drawn from the AOK statutory health insurance provider dataset included  
49  
50 165 13,478 hospitalised patients from an overall population of 31,079 nursing home resi-  
51  
52 166 dents and 560,998 hospitalised patients from an overall population of 3,841,166 AOK  
53  
54 167 insured persons living at home (Table 1).  
55  
56  
57  
58  
59  
60

168 Table 1. Observed Sample, Unadjusted hospitalisation patterns

|                                                  | Patients living    |                         | P-Value  |
|--------------------------------------------------|--------------------|-------------------------|----------|
|                                                  | ...in Nursing Home | ... not in Nursing Home |          |
| Number of patients                               | 31,079             | 3,841,166               | -        |
| Number of hospitalized patients                  | 13,478             | 560,998                 | -        |
| Number of readmissions                           | 23,982             | 909,260                 | -        |
| Hospitalization rate (per 100 patients per year) | 77.16              | 23.67                   | < 0.0001 |
| Potentially avoidable hospitalizations (n, %)    | 6,449 (26.89%)     | 136,543 (15.02%)        | < 0.0001 |
| Emergency/OOHC hospitalizations (n, %)           | 15,647 (65.24%)    | 398,167 (43.79%)        | < 0.0001 |

169

170 *Description of the included population*

171 Mean age of hospitalised patients living in nursing homes was  $80.58 \pm 13.31$  years with  
 172 significantly more women in this group than in the patient group living at home (68.56%  
 173 versus 53.64%). In comparison, the mean age of the hospitalised patients living at home  
 174 was  $55.52 \pm 24.66$  years. Hospitalised nursing home patients suffered from more chronic  
 175 diseases. In this study, level of care category for nursing home patients was significantly  
 176 higher than for patients living at home ( $1.82 \pm 0.76$  versus  $0.17 \pm 0.52$ ). HZV enrolment  
 177 (“family doctor coordinated care”) for hospitalised nursing home patients was some-  
 178 what lower than for hospitalised patients living at home (Table 2).

179 Table 2. Demographics of hospitalised patients

|                                       | Patients living    |                         | P-Value  |
|---------------------------------------|--------------------|-------------------------|----------|
|                                       | ...in Nursing Home | ... not in Nursing Home |          |
| Number of Patients                    | 13,478             | 560,998                 | -        |
| Age (AVG $\pm$ SD)                    | $80.58 \pm 13.31$  | $55.52 \pm 24.66$       | < 0.0001 |
| Gender (% female)                     | 68.56%             | 53.64%                  | < 0.0001 |
| Morbidity (AVG $\pm$ SD)              | $4.32 \pm 2.76$    | $2.23 \pm 2.65$         | < 0.0001 |
| Level of Care Category (AVG $\pm$ SD) | $1.82 \pm 0.76$    | $0.17 \pm 0.52$         | < 0.0001 |
| HZV Enrolment (% participation)       | 31.19%             | 38.88%                  | < 0.0001 |

1  
2  
3 180 *Hospitalisations patterns*

4 181 In total, 23,982 hospitalisations of patients living in nursing homes and 909,260 hospital-  
5  
6  
7 182 isations of patients living at home were evaluated for the 2015 period. This means a  
8  
9 183 hospitalisation rate of 77.16% versus 23.67% in the two different study groups. 15,647  
10  
11 184 hospitalisations of the nursing home patients were either unplanned or hospitalisations  
12  
13 185 due to an emergency (65.24%). In comparison, 398,167 of the 909,260 hospitalisations  
14  
15 186 of patients living at home were unplanned (43.79%). This was a significantly higher pro-  
16  
17 187 portion of unplanned hospitalisations for nursing home residents in comparison to pa-  
18  
19 188 tients living at home (Table1).

20  
21  
22  
23 189 *Comparison of Ambulatory Care Sensitive Conditions (ACSCs) of nursing home patients*  
24  
25 190 *and patients living at home*

26  
27 191 6,449 potentially avoidable hospitalisations of nursing home patients (26.9%) and  
28  
29 192 136,543 potentially avoidable hospitalisations of patients living at home (15.02%) were  
30  
31 193 identified. Comparing the two study populations, there was a significant increase in the  
32  
33 194 relative rate (79.03%) of ACSCs in the nursing home group. The adjusted odds ratios for  
34  
35 195 patients living in nursing homes were significantly higher than the patient group living at  
36  
37 196 home for potentially avoidable hospitalisations as well as for unplanned hospitalisations  
38  
39 197 (Table 3). In addition, 90.87% of PAHs with ACSCs were not in the category of planned  
40  
41 198 hospitalisations. By implication, less than 10% of PAHs were planned hospitalisations.

42  
43  
44  
45 199 Table 3. Adjusted odds ratios for hospitalisation target variables. (Nursing home patients  
46  
47 200 versus patients living at home)

|                                             | Odds Ratio | 95%-CI         | P-Value  |
|---------------------------------------------|------------|----------------|----------|
| Potentially avoidable hospitalizations      | 1.222      | [1.184, 1.262] | < 0.0001 |
| Unplanned (Emergency/OOHC) hospitalizations | 1.505      | [1.462, 1.549] | < 0.0001 |

48  
49  
50  
51  
52  
53  
54 201

55  
56 202  
57  
58  
59  
60

203 The top ten potentially avoidable hospitalisations according to ACSC category for both  
 204 groups are shown in Table 4. Pneumonia (J18), Fracture of Femur (S72), Volume depletion  
 205 (E86) and Epilepsy (G40) occurred noticeably more often in nursing home patients.

206 Table 4. Top ten potentially avoidable hospitalisations according to ACSC category.

| Nursing Home Patients |             |                                       |       |       | Non Nursing Home Patients |             |                                  |        |       |
|-----------------------|-------------|---------------------------------------|-------|-------|---------------------------|-------------|----------------------------------|--------|-------|
| Rank                  | ICD-10 Code | Diagnosis                             | n     | %     | Rank                      | ICD-10 Code | Diagnosis                        | n      | %     |
| 1                     | J18         | Pneumonia                             | 1,196 | 18.52 | 1                         | I50         | Heart failure                    | 21,775 | 15.94 |
| 2                     | I50         | Heart failure                         | 1,137 | 17.61 | 2                         | F10         | Disorders due to use of alcohol  | 16,204 | 11.86 |
| 3                     | S72         | Fracture of femur                     | 827   | 12.81 | 3                         | J18         | Pneumonia                        | 12,195 | 8.93  |
| 4                     | E86         | Volume depletion                      | 588   | 9.11  | 4                         | I20         | Angina pectoris                  | 11,474 | 8.40  |
| 5                     | G40         | Epilepsy                              | 549   | 8.50  | 5                         | I10         | Essential (primary) hypertension | 9,574  | 7.01  |
| 6                     | E11         | Type 2 diabetes mellitus              | 332   | 5.14  | 6                         | S72         | Fracture of femur                | 6,868  | 5.03  |
| 7                     | J20         | Acute bronchitis                      | 278   | 4.31  | 7                         | E11         | Type 2 diabetes mellitus         | 6,262  | 4.58  |
| 8                     | K21         | Gastro-oesophageal reflux disease     | 180   | 2.79  | 8                         | G40         | Epilepsy                         | 6,189  | 4.53  |
| 9                     | I10         | Essential (primary) hypertension      | 170   | 2.63  | 9                         | J20         | Acute bronchitis                 | 4,654  | 3.41  |
| 10                    | K59         | Other functional intestinal disorders | 120   | 1.86  | 10                        | E86         | Volume depletion                 | 4,434  | 3.25  |

207

208

## 209 Discussion

210 The analysis of the AOK statutory health insurance provider dataset identified numerous  
 211 PAHs especially in the context of UHs (including emergency and OOHC). 23,982 hospital-  
 212 isations of nursing home patients and 909,260 hospitalisations of patients living at home  
 213 occurred in 2015. Comparing the number of PAHs in both patient groups, the adjusted  
 214 odds ratios for UHs and for PAHs were significantly higher in the NH group. These results  
 215 are in accordance with several other international studies, which in particular identify  
 216 the need for improved continuity of care for people in nursing homes.<sup>10,12-15,30</sup> Haber et  
 217 al. showed in their study that consistency of the relationship between GP and nursing  
 218 home patient was an important factor of reducing potentially avoidable hospitalisations  
 219 and of reducing OOHC or ED visits.<sup>31</sup> It is of great importance that medical practitioners

1  
2  
3 220 (usually GPs) know the medical history of nursing home residents to ensure optimal care  
4  
5 221 management of patient health needs and to coordinate care between providers as well  
6  
7 222 as to anticipate potential deterioration of patient health conditions and therefore re-  
8  
9 223 duce unnecessary utilisation of acute hospital services.<sup>10,32</sup>

11  
12 224 NH patients with ACSCs who do not have a primary health care provider in regular at-  
13  
14 225 tendance will be potentially frequent attenders in OOHC and EDs.<sup>33,34</sup> The overcrowding  
15  
16 226 of OOHC centers and EDs is as well as PAHs of NH patients are stretching resources to  
17  
18 227 the limits in health care systems of many European countries and the United States of  
19  
20 228 America.<sup>35,36</sup> Frequent attenders or patients with minor ailments are in large part re-  
21  
22 229 sponsible for the high workload of physicians and staff in OOHC and EDs.

23  
24  
25  
26  
27 230 Consultations of these patients with minor ailments in OOHC or EDs should be avoided,  
28  
29 231 except for the most urgent or complex cases.<sup>37-39</sup> However, this is creating the need for  
30  
31 232 new approaches to conditions such as pneumonia, falls risk (e.g. to prevent fracture of  
32  
33 233 femur), volume depletion and epilepsy, which are four of the most frequent diagnoses  
34  
35 234 connected with potentially avoidable hospitalisations in our study and common prob-  
36  
37 235 lems in nursing homes.<sup>16,40,41</sup> Prophylactic and monitoring procedures for these condi-  
38  
39 236 tions are possible and do not seem to be too complex in the first instance. However,  
40  
41 237 individually tailored prophylactic and monitoring procedures for nursing home residents  
42  
43 238 are resource intensive in terms of both time and staff and, due to resource constraints  
44  
45 239 and workforce shortages, are a major cause of current deficiencies in care provision.

46  
47  
48  
49  
50 240 In times of an increasing shortage of primary care providers specifically GPs and of insuf-  
51  
52 241 ficient nursing home staff, health policies and health services experts have to look for  
53  
54 242 innovative approaches to ease the health care services crisis emerging in nursing homes.

1  
2  
3 243 In addition, it is also of importance that nursing home staff are formally empowered to  
4  
5 244 manage minor ailments like fever and pain in the first instance. Currently in Germany,  
6  
7 245 this is a limitation as a high proportion of staff in nursing homes lack the required com-  
8  
9 246 petencies and training and, furthermore, government regulations prohibit independent  
10  
11 247 clinical decisions of nursing staff in nursing homes and require them to be made in con-  
12  
13 248 sultation with a medical practitioner.<sup>42,43</sup>

14  
15  
16  
17 249 In Germany, the current government has introduced a new policy to address this press-  
18  
19 250 ing problem and agreed to fund 8,000 new geriatric nurses (*Altenpflege*) with enhanced  
20  
21 251 competencies for nursing homes through the statutory health insurance.<sup>44</sup> The policy for  
22  
23 252 upskilling a segment of the geriatric nursing workforce is one important step but will not  
24  
25 253 bring immediate improvements to coordination of care and information flow between  
26  
27 254 the different providers across health care sectors. Potentially avoidable hospitalisations  
28  
29 255 of nursing home residents and effective outpatient management remain complex prob-  
30  
31 256 lems that must be dealt with in parallel on many fronts.

32  
33  
34  
35  
36 257 The complex difficulties in improving the care of nursing home residents were shown in  
37  
38 258 the INTERACT-program (Interventions to reduce Acute Care Transfers) a randomised  
39  
40 259 prospective study. Despite training and support of the staff, the objectives of reducing  
41  
42 260 hospital admissions or ED visits for NH residents were not achieved.<sup>42</sup> Kane et al. explain  
43  
44 261 the lack of effectiveness are being due to a multitude of interacting factors: Quality of  
45  
46 262 the NH staff, lacking continuous medical care, concerns over liability and poor motiva-  
47  
48 263 tion to reduce hospitalisations in nursing home patients.<sup>42</sup>

49  
50  
51  
52  
53 264 Perhaps in future service providers such as nurse practitioners, physician assistants – in  
54  
55 265 Germany VERAH (*Versorgungsassistentin in der Hausarztpraxis*)- palliative care teams,

1  
2  
3 266 geriatric specialist services may support primary care providers (GPs) and nursing home  
4  
5 267 staff in improving medical care and reducing potentially avoidable hospital admissions  
6  
7 268 of nursing home residents.<sup>10,45-47</sup> However the effects of these new models or interven-  
8  
9 269 tions are low and should be studied further.<sup>47</sup>

11  
12 270 A further initiative by the German government has been the introduction of the “Inno-  
13  
14 271 vation Fund”. With this programme, health services research projects are subsidised,  
15  
16 272 and this includes among others, pilot projects to improve the care of nursing home resi-  
17  
18 273 dents and to reduce potentially avoidable hospitalisations. It remains to be seen, if the  
19  
20 274 results of these projects translate to improved responsiveness to the needs of nursing  
21  
22 275 home residents.<sup>48-50</sup>

23  
24  
25  
26  
27 276 Finally, the issue of remuneration needs to be addressed. High workloads, dealing with  
28  
29 277 the impacts of staff shortages and increasingly complex patient care requirements in the  
30  
31 278 primary care sector, place a burden on the existing workforce. GPs, other specialists and  
32  
33 279 nursing staff should also be remunerated adequately and advanced training to upskill  
34  
35 280 staff should be incentivised. In that respect, NHs, insurance companies and the govern-  
36  
37 281 ment are called upon to give financial incentives.<sup>4,10,51,52</sup>

38  
39  
40  
41 282

### 42 283 **Conclusions**

43  
44 284 A high rate of UHs and of PAHs especially for nursing home residents suggests that the  
45  
46 285 health care provision in NHs needs improvement. At the individual level, physicians in  
47  
48 286 primary care and OOHC and the staff in NHs have to be sensitised to manage common  
49  
50 287 health problems of patients that too often result in UHs and PAHs. Prerequisites for im-  
51  
52 288 proved inter-sectoral collaboration are sufficient numbers of nursing home staff, up-  
53  
54 289 skilled with today’s needed competencies and GPs/primary care medical specialists who



1  
2  
3 290 are motivated to upskill in geriatric health care. Finally, at a system level, policy makers  
4  
5 291 and regulators of the health professions need to use incentives and remuneration pro-  
6  
7 292 grams to achieve the ambitious goals of improving nursing home care and reducing po-  
8  
9 293 tentially avoidable hospitalisations of nursing home residents.

11  
12 294 **Author Contributions** GL, JS and RL initiated and designed the study. GL and RL coordi-  
13 295 nated the study. GL carried out data analysis. RL, SB (native English speaker) and GL  
14 296 wrote the manuscript. All authors (RL, SB, JS and GL) commented on the draft and ap-  
15 297 proved the final version of the manuscript.

16  
17  
18 298 **Funding** This research received no specific grant from any funding agency in the public,  
19 299 commercial or not-for-profit-sectors.

20  
21 300 **Acknowledgement** The data usage grant from the AOK Baden-Wuerttemberg for this  
22 301 study is greatly acknowledged.

23  
24 302 **Competing interests** None declared

25  
26 303 **Patient consent** Not required

27  
28 304 **Data sharing statements** Data used in this analysis are not in the public domain an use  
29 305 was covered by data sharing agreements with the AOK Baden-Wuerttemberg.

30  
31 306

32  
33 307

34  
35 308

36  
37 309 **References**

- 38  
39 310 1. Pflegestatistik- Statistisches Bundesamt  
40 311 [https://www.destatis.de/DE/Publikationen/Thematisch/Gesundheit/Pflege/Pf-](https://www.destatis.de/DE/Publikationen/Thematisch/Gesundheit/Pflege/PflegeDeutschlandergebnisse5224001159004.pdf?__blob=publicationFile)  
41 312 [legeDeutschlandergebnisse5224001159004.pdf?\\_\\_blob=publicationFile](https://www.destatis.de/DE/Publikationen/Thematisch/Gesundheit/Pflege/PflegeDeutschlandergebnisse5224001159004.pdf?__blob=publicationFile).  
42 313 (Accessed on 06-JUL-2018)  
43 314 2. Bedarfsgerechte Versorgung Sachverständigengutachten 2014  
44 315 [http://www.svr-gesundheit.de/fileadmin/user\\_upload/Gutachten/](http://www.svr-gesundheit.de/fileadmin/user_upload/Gutachten/2014/Zusammenfassung_GA_2014.pdf)  
45 316 [2014/Zusammenfassung\\_GA\\_2014.pdf](http://www.svr-gesundheit.de/fileadmin/user_upload/Gutachten/2014/Zusammenfassung_GA_2014.pdf). (Accessed on 06-JUL-2018)  
46 317 3. Atramont A, Bourdel-Marchasson I, Bonnet-Zamponi D, Tangre I, Fagot-  
47 318 Campagna A, Tuppin P. Impact of nursing home hospitalization on health care  
48 319 use and disease status elderly dependent people one year before and one year  
49 320 after skilled nursing home hospitalization based on 2012-2013 SNIIRAM data.  
50 321 BMC Health Serv Res 2017;17(1):667.  
51 322 4. Groom L, Avery AJ, Boot D, O'Neill C, Thornhill K, Brown K, Jones R. The impact  
52 323 of nursing home patients on general practitioners' workload. Br J Gen Pract  
53 324 2000;50(455):473-6.

- 1  
2  
3 325 5. McDermott C, Coppin R, Little P, Leydon G. Hospital hospitalizations from nurs-  
4 326 ing homes: a qualitative study of GP decision making. *Br J Gen Pract*  
5 327 2012;62(601):e538-45.
- 6 328 6. Bundesministerium für Familie, Senioren, Frauen und Jugend.  
7 329 Altenpflegegesetz des Bundes.  
8 330 [https://www.altenpflegeausbildung.net/fachinformationen/altenpflegegesetz-  
10 331 des-bundes.html](https://www.altenpflegeausbildung.net/fachinformationen/altenpflegegesetz-<br/>9 331 des-bundes.html) (Accessed on 06-JUL-2018)
- 11 332 7. Bleckwenn M, Ashrafnia D, Schnakenberg R, Weckbecker K. [Urgent Visits to  
12 333 Nursing Homes: A General Practitioner's Perspective]. *Gesundheitswesen*  
13 334 2017;doi: 10.1055/s-0043-110852.
- 14 335 8. Bleckwenn M, Bell L, Schnakenberg R, Weckbecker K, Klaschik M. [Outpatient  
15 336 Emergency Care for Nursing Home Residents: A Status Quo from a Nursing  
16 337 Perspective]. *Gesundheitswesen* 2018;doi: 10.1055/a-0592-6475 (in press).
- 17 338 9. Rommel A, Kottner J, Suhr R, Lahmann N. [Frequency of falls among clients of  
18 339 home care services: The importance of care-related and social risk factors].  
19 340 *Z Gerontol Geriatr* 2017;doi: 10.1007/s00391-017-1215-5 (in press).
- 20 341 10. Ouslander JG, Lamb G, Perloe M, Givens JH, Kluge L, Rutland T, Atherly A, Sali-  
21 342 ba D. Potentially avoidable hospitalizations of nursing home residents: fre-  
22 343 quency, causes, and costs: [see editorial comments by Drs. Jean F. Wyman and  
23 344 William R. Hazzard, pp 760-761]. *J Am Geriatr Soc* 2010;58(4):627-35.
- 24 345 11. Grabowski DC, O'Malley AJ, Barhydt NR. The costs and potential savings asso-  
25 346 ciated with nursing home hospitalizations. *Health Aff (Millwood)* 2007;  
26 347 26(6):1753-61
- 27 348 12. Walker JD, Teare GF, Hogan DB, Lewis S, Maxwell CJ. Identifying potentially  
28 349 avoidable hospital hospitalizations from canadian long-term care facilities.  
29 350 *Med Care* 2009;47(2):250-4.
- 30 351 13. Wyman JF, Hazzard WR. Preventing avoidable hospitalizations of nursing home  
31 352 residents: a multipronged approach to a perennial problem. *J Am Geriatr Soc*  
32 353 2010;58(4):760-1.
- 33 354 14. Van Rensbergen G, Nawrot T. Medical conditions of nursing home hospitaliza-  
34 355 tions. *BMC Geriatr* 2010;10:46
- 35 356 15. Carron PN, Mabire C, Yersin B, Büla C. Nursing home residents at the Emergen-  
36 357 cy Department: a 6-year retrospective analysis in a Swiss academic hospital. *In-  
37 358 tern Emerg Med* 2017;12(2):229-237
- 38 359 16. Briggs R, Coughlan T, Collins R, O'Neill D, Kennelly SP. Nursing home residents  
39 360 attending the emergency department: clinical characteristics and outcomes.  
40 361 *QJM* 2013;106(9):803-8.
- 41 362 17. Carron PN, Mabire C, Yersin B, Büla C. Nursing home residents at the Emergen-  
42 363 cy Department: a 6-year retrospective analysis in a Swiss academic hospital. *In-  
43 364 tern Emerg Med* 2017;12(2):229-237.
- 44 365 18. Dwyer R, Gabbe B, Stoelwinder JU, Lowthian J. A systematic review of out-  
45 366 comes following emergency transfer to hospital for residents of aged care fa-  
46 367 cilities. *Age Ageing* 2014;43(6):759-66.

1  
2  
3  
4  
5  
6  
7  
8  
9  
10  
11  
12  
13  
14  
15  
16  
17  
18  
19  
20  
21  
22  
23  
24  
25  
26  
27  
28  
29  
30  
31  
32  
33  
34  
35  
36  
37  
38  
39  
40  
41  
42  
43  
44  
45  
46  
47  
48  
49  
50  
51  
52  
53  
54  
55  
56  
57  
58  
59  
60

- 368 19. Purdy S, Griffin T, Salisbury C, Sharp D. Ambulatory care sensitive conditions:  
369 terminology and disease coding need to be more specific to aid policy makers  
370 and clinicians. *Public Health* 2009;123(2):169-73.
- 371 20. Freund T, Campbell SM, Geissler S, Kunz CU, Mahler C, Peters-Klimm F,  
372 Szecsenyi J. Strategies for reducing potentially avoidable hospitalizations for  
373 ambulatory care-sensitive conditions. *Ann Fam Med* 2013;1(4):363-7.
- 374 21. Sundmacher L, Fischbach D, Schuettig W, Naumann C, Augustin U, Faisst C.  
375 Which hospitalisations are ambulatory care-sensitive, to what degree, and how  
376 could the rates be reduced? Results of a group consensus study in Germany.  
377 *Health Policy* 2015;119(11):1415-23.
- 378 22. Laux G, Kaufmann-Kolle P, Bauer E, Goetz K, Stock C, Szecsenyi J. Evaluation of  
379 family doctor centred medical care based on AOK routine data in Baden-  
380 Wuerttemberg. *Z Evid Fortbild Qual Gesundheitswes* 2013;107(6):372-8.
- 381 23. Bundesgesundheitsministerium. Online-Ratgeber Pflege.  
382 [https://www.bundesgesundheitsministerium.de/themen/pflege/online-](https://www.bundesgesundheitsministerium.de/themen/pflege/online-ratgeber-pflege/pflegebeduerftigkeit.html)  
383 [ratgeber-pflege/pflegebeduerftigkeit.html](https://www.bundesgesundheitsministerium.de/themen/pflege/online-ratgeber-pflege/pflegebeduerftigkeit.html) (Accessed on 06-JUL-2018).
- 384 24. Bundesgesundheitsministerium. Meldungen 2016-Neuregelungen 2017.  
385 [https://www.bundesgesundheitsministerium.de/ministerium/meldungen/201](https://www.bundesgesundheitsministerium.de/ministerium/meldungen/2016/neuregelungen-2017.html)  
386 [6/neuregelungen-2017.html](https://www.bundesgesundheitsministerium.de/ministerium/meldungen/2016/neuregelungen-2017.html) (Accessed on 06-JUL-2018)
- 387 25. Goodwin N, Curry N, Naylor C, Ross S, Duldig W. Managing people with  
388 long-term conditions.  
389 [https://www.kingsfund.org.uk/sites/default/files/field/field\\_](https://www.kingsfund.org.uk/sites/default/files/field/field_document/managing-people-long-term-conditions-gp-inquiry-research-paper-mar11.pdf)  
390 [document/manag](https://www.kingsfund.org.uk/sites/default/files/field/field_document/managing-people-long-term-conditions-gp-inquiry-research-paper-mar11.pdf)  
391 [ing-people-long-term-conditions-gp-inquiry-research-paper-mar11.pdf](https://www.kingsfund.org.uk/sites/default/files/field/field_document/managing-people-long-term-conditions-gp-inquiry-research-paper-mar11.pdf)  
392 (Accessed on 06-JUL-2018)
- 393 26. NHS. Next steps on the NHS five year forward view  
394 [https://www.england.nhs.uk/wp-content/uploads/2017/03/NEXT-STEPS-ON-](https://www.england.nhs.uk/wp-content/uploads/2017/03/NEXT-STEPS-ON-THE-NHS-FIVE-YEAR-FORWARD-VIEW.pdf)  
395 [THE-NHS-FIVE-YEAR-FORWARD-VIEW.pdf](https://www.england.nhs.uk/wp-content/uploads/2017/03/NEXT-STEPS-ON-THE-NHS-FIVE-YEAR-FORWARD-VIEW.pdf) (Accessed 06-JUL-2018)
- 396 27. Watson L. New models of care programme for PACs and MCPs  
397 [https://www.kingsfund.org.uk/sites/default/files/media/Louise\\_Watson.pdf](https://www.kingsfund.org.uk/sites/default/files/media/Louise_Watson.pdf)  
398 (Accessed 06-JUL-2018)
- 399 28. Sundararajan V, Henderson T, Perry C, Muggivan A, Quan H, Ghali WA. New  
400 ICD-10 version of the Charlson comorbidity index predicted in-hospital mortality. *J Clin Epidemiol* 2004;57:1288-94.
- 401 29. PROC GENMOD Statement. SAS User's Guide, Second Edition.  
402 [http://support.sas.com/documentation/cdl/en/statug/63347/HTML/default/vi](http://support.sas.com/documentation/cdl/en/statug/63347/HTML/default/viewer.htm#statug_genmod_sect010.html)  
403 [ewer.htm#statug\\_genmod\\_sect010.html](http://support.sas.com/documentation/cdl/en/statug/63347/HTML/default/viewer.htm#statug_genmod_sect010.html). (Accessed 06-JUL-2018).
- 404 30. Brownell J, Wang J, Smith A, Stephens C, Hsia RY. Trends in emergency de-  
405 partment visits for ambulatory care sensitive conditions by elderly nursing  
406 home residents, 2001 to 2010. *JAMA Intern Med* 2014;174(1):156-8.
- 407 31. Haber SG, Wensky SG, McCall NT. Reducing Inpatient Hospital and Emergency  
408 Room Utilization Among Nursing Home Residents. *J Aging Health* 2017 (3):510-  
409 530.
- 410 32. Konetzka RT, Stearns SC, Park J. The staffing-outcomes relationship in nursing  
411 homes. *Health Serv Res* 2008;43(3):1025-42.

- 1  
2  
3 412 33. Buja A, Fusco M, Furlan P, Bertoncello C, Baldovin T, Casale P, Marcolongo A,  
4 413 Baldo V. Referral patterns in elderly emergency department visits. *Ann Ist Su-*  
5 414 *per Sanita* 2013;49(4):395-401.  
6 415 34. Lukin B, Fan LJ, Zhao JZ, Sun JD, Dingle K, Purtill R, Tapp S, Hou XY. Emergency  
7 416 department use among patients from residential aged care facilities under a  
8 417 Hospital in the Nursing Home scheme in public hospitals in Queensland Aus-  
9 418 tralia. *World J Emerg Med* 2016;7(3):183-90.  
10 419 35. Margolius D, Bodenheimer T. Redesigning after-hours primary care [Editorial].  
11 420 *Ann Intern Med* 2011;155:131-2.  
12 421 36. Majeed A . Redesigning after-hours primary care. *Ann Intern Med* 2012;156:  
13 422 67-8.  
14 423 37. Leutgeb R, Engeser P, Berger S, Szecsenyi J, Laux G. Out of hours care in Ger-  
15 424 many - High utilization by adult patients with minor ailments? *BMC Fam Pract*  
16 425 2017;18(1):42.  
17 426 38. Jacob R, Wong ML, Hayhurst C, Watson P, Morrison C. Designing services for  
18 427 frequent attenders to the emergency department: a characterisation of this  
19 428 population to inform service design. *Clin Med (Lond)* 2016;16(4):325-9.  
20 429 39. den Boer-Wolters D, Knol MJ, Smulders K, de Wit NJ. Frequent attendance of  
21 430 primary care out-of-hours services in the Netherlands: characteristics of pa-  
22 431 tients and presented morbidity. *Fam Pract* 2010;27(2):129-34.  
23 432 40. Büchele G, Becker C, Cameron ID, König HH, Robinovitch S, Rapp K. Predictors  
24 433 of serious consequences of falls in residential aged care: analysis of more than  
25 434 70,000 falls from residents of Bavarian nursing homes. *J Am Med Dir Assoc*  
26 435 2014;(8):559-63.  
27 436 41. Aymes S. Neurology Advisor: Epilepsy, Seizures Common Among Nursing  
28 437 Home Population.  
29 438 [https://neurologyadvisor.com/epilepsy/epilepsy-seizures-common-in-nursing-](https://neurologyadvisor.com/epilepsy/epilepsy-seizures-common-in-nursing-home-elderly/article/643330)  
30 439 [home-elderly/article/643330](https://neurologyadvisor.com/epilepsy/epilepsy-seizures-common-in-nursing-home-elderly/article/643330) (Accessed 06-JUL-2018).  
31 440 42. Kane RL, Huckfeldt P, Tappen R, Engstrom G, Rojido C, Newman D, Yang Z,  
32 441 Ouslander JG. Effects of an Intervention to Reduce Hospitalizations From Nurs-  
33 442 ing Homes: A Randomized Implementation Trial of the INTERACT Program.  
34 443 *JAMA Intern Med* 2017; 177(9):1257-1264.  
35 444 43. McDermott C, Coppin R, Little P, Leydon G. Hospital admissions from nursing  
36 445 homes: a qualitative study of GP decision making. *Br J Gen Pract* 2012;  
37 446 62(601):e538-45.  
38 447 44. Koalitionsvertrag zwischen CDU, CSU und SPD 19. Legislaturperiode 2018.  
39 448 [https://www.bundesregierung.de/Content/DE/\\_Anlagen/2018/03/2018-03-](https://www.bundesregierung.de/Content/DE/_Anlagen/2018/03/2018-03-14-koalitionsvertrag.pdf)  
40 449 [14-koalitionsvertrag.pdf](https://www.bundesregierung.de/Content/DE/_Anlagen/2018/03/2018-03-14-koalitionsvertrag.pdf). (Accessed 06-JUL-2018).  
41 450 45. Kane RL, Keckhafer G, Flood S et al. The effect of Evercare on hospital use. *J*  
42 451 *Am Geriatr Soc* 2003;51:1427–1434.  
43 452 46. VERAH (Versorgungsassistentin in der Hausarztpraxis). <https://www.verah.de/>.  
44 453 (Accessed 06-JUL-2018)  
45 454 47. Graverholt B, Forsetlund L, Jamtvedt G. Reducing hospital admissions from  
46 455 nursing homes: a systematic review. *BMC Health Serv Res* 2014;14:36.

- 1  
2  
3 456 48. Gemeinsamer Bundesausschuss. Erweiterte ärztliche Pflegeheimversorgung.  
4 457 [https://innovationsfonds.g-ba.de/projekte/neue-versorgungsformen/cocare-](https://innovationsfonds.g-ba.de/projekte/neue-versorgungsformen/cocare-coordinated-medical-care-erweiterte-koordinierte-aerztliche-pflegeheimversorgung)  
5 458 [coordinated-medical-care-erweiterte-koordinierte-aerztliche-](https://innovationsfonds.g-ba.de/projekte/neue-versorgungsformen/cocare-coordinated-medical-care-erweiterte-koordinierte-aerztliche-pflegeheimversorgung)  
6 459 [pflegeheimversorgung](https://innovationsfonds.g-ba.de/projekte/neue-versorgungsformen/cocare-coordinated-medical-care-erweiterte-koordinierte-aerztliche-pflegeheimversorgung).70. (Accessed 06-JUL-2018).  
7  
8 460 49. Gemeinsamer Bundesausschuss. Effekte von Strategien zur Verbesserung  
9 461 ärztlich-pflegerischer Zusammenarbeit auf Krankenhausaufnahmen von  
10 462 Pflegeheimbewohnern  
11 463 [https://innovationsfonds.g-ba.de/projekte/versorgungsforschung/interprof-](https://innovationsfonds.g-ba.de/projekte/versorgungsforschung/interprof-act-effekte-von-strategien-zur-verbesserung-aerztlich-pflegerischer-zusammenarbeit-auf-krankenhausaufnahmen-von-pflegeheimbewohnern)  
12 464 [act-effekte-von-strategien-zur-verbesserung-aerztlich-pflegerischer-](https://innovationsfonds.g-ba.de/projekte/versorgungsforschung/interprof-act-effekte-von-strategien-zur-verbesserung-aerztlich-pflegerischer-zusammenarbeit-auf-krankenhausaufnahmen-von-pflegeheimbewohnern)  
13 465 [zusammenarbeit-auf-krankenhausaufnahmen-von-pflegeheimbewohnern](https://innovationsfonds.g-ba.de/projekte/versorgungsforschung/interprof-act-effekte-von-strategien-zur-verbesserung-aerztlich-pflegerischer-zusammenarbeit-auf-krankenhausaufnahmen-von-pflegeheimbewohnern).62.  
14 466 (Accessed 06-JUL-2018).  
15 467 50. Gemeinsamer Bundesausschuss. Hospitalisierung und Notaufnahmebesuche  
16 468 von Pflegeheimbewohnern. Intervention zur Verbesserung der Versorgung.  
17 469 [https://innovationsfonds.g-ba.de/projekte/versorgungsforschung/homern-](https://innovationsfonds.g-ba.de/projekte/versorgungsforschung/homern-hospitalisierung-und-notaufnahmebesuche-von-pflegeheimbewohnern-haeufigkeit-ursachen-und-entwicklung-einer-intervention-zur-verbesserung-der-versorgung)  
18 470 [hospitalisierung-und-notaufnahmebesuche-von-pflegeheimbewohnern-](https://innovationsfonds.g-ba.de/projekte/versorgungsforschung/homern-hospitalisierung-und-notaufnahmebesuche-von-pflegeheimbewohnern-haeufigkeit-ursachen-und-entwicklung-einer-intervention-zur-verbesserung-der-versorgung)  
19 471 [haeufigkeit-ursachen-und-entwicklung-einer-intervention-zur-verbesserung-](https://innovationsfonds.g-ba.de/projekte/versorgungsforschung/homern-hospitalisierung-und-notaufnahmebesuche-von-pflegeheimbewohnern-haeufigkeit-ursachen-und-entwicklung-einer-intervention-zur-verbesserung-der-versorgung)  
20 472 [der-versorgung](https://innovationsfonds.g-ba.de/projekte/versorgungsforschung/homern-hospitalisierung-und-notaufnahmebesuche-von-pflegeheimbewohnern-haeufigkeit-ursachen-und-entwicklung-einer-intervention-zur-verbesserung-der-versorgung).54. (Accessed 06-JUL-2018).  
21 473 51. Gleeson LE, Jennings S, Gavin R, McConaghy D, Collins DR. Primary care in  
22 474 nursing homes revisited: survey of the experiences of primary care physicians.  
23 475 *Ir Med J* 2014;107(8):234-6.  
24 476 52. Ashton T. Hospitalizations of nursing homes residents: the role of reimburse-  
25 477 ment policies. *Isr J Health Policy Res* 2014;3(1):3.  
26 478  
27 479  
28  
29  
30  
31  
32  
33  
34

## 481 Appendix

482  
483 Supplement 1: List of ICD 10-GM Codes Used to Identify Hospitalizations for Ambulatory  
484 Care–Sensitive Conditions  
485

## Supplement 1

**Supplemental Table 1. List of ICD 10-GM Codes Used to Identify Hospitalizations for Ambulatory Care–Sensitive Conditions**

| <i>Ambulatory Care Sensitive Condition</i>     | <i>ICD10-GM Code</i>                                                                              |
|------------------------------------------------|---------------------------------------------------------------------------------------------------|
| Angina                                         | I20, I24.0, I24.8, I24.9                                                                          |
| Asthma                                         | J45, J46                                                                                          |
| Cellulitis                                     | L03, L04, L08.0, L08.8, L08.9, L88, L98.0                                                         |
| Congestive heart failure                       | I11.0, I50, J81                                                                                   |
| Convulsion and epilepsy                        | G40, G41, R56, O15                                                                                |
| Chronic obstructive pulmonary disease          | J20, J41, J42, J43, J47                                                                           |
| Dehydration and gastroenteritis                | E86, K52.2, K52.8, K52.9                                                                          |
| Dental conditions                              | A69.0, K02, K03, K04, K05, K06, K08, K09.8, K09.9, K12, K13                                       |
| Diabetes complications                         | E10.0–E10.8, E11.0–E11.8, E12.0–E12.8, E13.0–E13.8, E14.0–E14.8                                   |
| Ear, nose and throat infections                | H66, H67, J02, J03, J06, J31.2                                                                    |
| Gangrene                                       | R02                                                                                               |
| Hypertension                                   | I10, I11.9                                                                                        |
| Influenza and pneumonia                        | J10, J11, J13, J14, J15.3, J15.4, J15.7, J15.9, J16.8, J18.1, J18                                 |
| Iron-deficiency anemia                         | D50.1, D50.8, D50.9                                                                               |
| Nutritional deficiency                         | E40, E41, E42, E43, E55.0, E64.3                                                                  |
| Other vaccine preventable diseases             | A35, A36, A37, A80, B05, B06, B16.1, B16.9, B18.0, B18.1, B26, G00.0, M01.4                       |
| Pelvic inflammatory disease                    | N70, N73, N74                                                                                     |
| Perforated/bleeding ulcer                      | K25.0–K25.2, K25.4–K25.6, K26.0–K26.2, K26.4–K26.6, K27.0–K27.2, K27.4–K27.6, K280–282, K284–K286 |
| Pyelonephritis                                 | N10, N11, N12, N13.6                                                                              |
| Alcohol-related diseases                       | F10                                                                                               |
| Atrial fibrillation and flutter                | I47.1, I47.9, I49.5, I49.8, I49.9, R00.0, R002, R00.8                                             |
| Constipation                                   | K59.0                                                                                             |
| Fractured proximal femur                       | S72.0, S72.1, S72.2                                                                               |
| Dyspepsia and other stomach function disorders | K30, K21                                                                                          |
| Hypokalemia                                    | E87.6                                                                                             |
| Migraine/acute headache                        | G43, G44.0, G44.1, G44.3, G44.4, G44.8, R51x                                                      |

ICD-10-GM = International Classification of Diseases-, 10<sup>th</sup> Revision – German Modification.

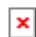

**Potentially avoidable hospitalisations of German nursing home patients? A cross-sectional study on utilisation patterns and potential consequences for health care**

|                                 |                                                                                                                                                                                                                                                                                                                                                                                                         |
|---------------------------------|---------------------------------------------------------------------------------------------------------------------------------------------------------------------------------------------------------------------------------------------------------------------------------------------------------------------------------------------------------------------------------------------------------|
| Journal:                        | <i>BMJ Open</i>                                                                                                                                                                                                                                                                                                                                                                                         |
| Manuscript ID                   | bmjopen-2018-025269.R1                                                                                                                                                                                                                                                                                                                                                                                  |
| Article Type:                   | Research                                                                                                                                                                                                                                                                                                                                                                                                |
| Date Submitted by the Author:   | 17-Oct-2018                                                                                                                                                                                                                                                                                                                                                                                             |
| Complete List of Authors:       | Leutgeb, Rüdiger; UniversitätsKlinikum Heidelberg, General Practice and Health Services Research<br>Berger, Sarah; UniversitätsKlinikum Heidelberg, General Practice and Health Services Research<br>Szecsenyi, Joachim; UniversitätsKlinikum Heidelberg, General Practice and Health Services Research<br>Laux, Gunter; UniversitätsKlinikum Heidelberg, General Practice and Health Services Research |
| <b>Primary Subject Heading</b>: | General practice / Family practice                                                                                                                                                                                                                                                                                                                                                                      |
| Secondary Subject Heading:      | Geriatric medicine                                                                                                                                                                                                                                                                                                                                                                                      |
| Keywords:                       | PRIMARY CARE, GERIATRIC MEDICINE, Human resource management < HEALTH SERVICES ADMINISTRATION & MANAGEMENT, Quality in health care < HEALTH SERVICES ADMINISTRATION & MANAGEMENT                                                                                                                                                                                                                         |
|                                 |                                                                                                                                                                                                                                                                                                                                                                                                         |

SCHOLARONE™  
Manuscripts

1  
2  
3  
4  
5  
6  
7  
8  
9  
10  
11  
12  
13  
14  
15  
16  
17  
18  
19  
20  
21  
22  
23  
24  
25  
26  
27  
28  
29  
30  
31  
32  
33  
34  
35  
36  
37  
38  
39  
40  
41  
42  
43  
44  
45  
46  
47  
48  
49  
50  
51  
52  
53  
54  
55  
56  
57  
58  
59  
60

1 **Potentially avoidable hospitalisations of German nursing home patients? A cross-**  
2 **sectional study on utilisation patterns and potential consequences for health care**

3 Rüdiger Leutgeb<sup>1</sup>, Sarah Berger<sup>1</sup>, Joachim Szecsenyi<sup>1</sup>, Gunter Laux<sup>1</sup>.

4  
5 <sup>1</sup>*Department of General Practice and Health Services Research, University Hospital Heidelberg, Marsilius-*  
6 *Arcades, Im Neuenheimer Feld 130.3, 69120 Heidelberg, Germany.*  
7

8 **Correspondence to** Ruediger Leutgeb MD; [ruediger.leutgeb@med.uni-heidelberg.de](mailto:ruediger.leutgeb@med.uni-heidelberg.de)

9 **Word Count** 3,188

For peer review only



1  
2  
3 **10 Abstract**  
4  
5

6 **11 Objectives** Demand for nursing home (NH) care is soaring due to gains in life expectancy  
7  
8  
9 **12** and people living longer with chronic illness and disability. This is dovetailing with workforce  
10  
11 **13** shortages across the health professions. Access to timely and appropriate medical care for  
12  
13 **14** NH residents is becoming increasingly challenging and can result in potentially avoidable  
14  
15 hospitalisations (PAHs). In light of these factors, we analysed PAHs comparing NH patients  
16  
17 **15** with Non-NH patients.  
18  
19

20  
21 **17 Design** Cross-sectional study with claims data from 2015 supplied by a large German health  
22  
23  
24 **18** insurance company within the federal state of Baden-Wuerttemberg.  
25  
26

27 **19 Setting** One year observation of hospitalisation patterns for NH and Non-NH patients.  
28  
29

30 **20 Participants** 3,872,245 of the 10.5 Million inhabitants of Baden-Wuerttemberg were  
31  
32  
33 **21** covered.  
34  
35

36 **22 Methods** Patient data about hospitalisation date, sex, age, nationality, level of care and  
37  
38 **23** diagnoses were available. PAHs were defined based on ICD-10 diagnoses belonging to  
39  
40 **24** Ambulatory Care Sensitive Conditions (ACSCs). Adjusted odds ratios for PAHs for NH  
41  
42 **25** patients in comparison to Non-NH patients were calculated with multivariable regression  
43  
44 **26** models.  
45  
46  
47

48 **27 Results** Of the 933,242 hospitalisations in 2015, there were 23,982 for 13,478 NH patients  
49  
50  
51 **28** and 909,260 for 560,998 Non-NH patients. Mean age of hospitalised NH patients and level  
52  
53 **29** of care were significantly higher than those of Non-NH patients. 6,449 PAHs (29.6%) for NH  
54  
55 **30** patients and 136,543 PAHs (15.02%) for Non-NH patients were identified. The adjusted  
56  
57  
58

1  
2  
3 31 odds ratio for PAHs was significantly heightened for NH patients in comparison to Non-NH  
4  
5  
6 32 patients (OR: 1.22, CI:[1.18, 1.26],  $p < 0.0001$ ). Moreover, we could observe that more than  
7  
8 33 90% of PAHs with ACSCs were unplanned (UHs).  
9

10  
11 34 **Conclusions** Large numbers of PAHs for NH patients calls for improved coordination of  
12  
13  
14 35 medical care, especially GP service provision. Introduction of targeted training programs for  
15  
16 36 physicians and NH staff on health problem management for NH patients could perhaps  
17  
18 37 contribute to reduction of PAHs, predominantly UHs.  
19  
20

### 21 38 **Strengths and limitations of this study**

- 22  
23  
24  
25 39 • The evaluation reports on a comprehensive sample of data of one year covering one  
26 40 whole federal state of Germany.  
27  
28 41 • This is the first study comparing potentially avoidable hospitalisations of nursing  
29 42 home residents with people living at home.  
30  
31 43 • It was possible to separate planned from unplanned hospitalisations.  
32 44 • Our study design did not allow for remarks about sociodemographic data of the  
33 45 study population.  
34 46 • Information on the staffing ratio or the education of the nursing home staff was not  
35 47 available to us.  
36  
37  
38  
39

40  
41 49 **Keywords** Nursing Homes; potentially avoidable hospitalisations; unplanned  
42  
43 50 hospitalisations; Ambulatory Care-Sensitive Conditions; Out-of-Hours Care.  
44  
45

46 51

47  
48 52

## 53 **Background**

54 Demand for nursing home (NH) care is soaring due to gains in life expectancy and people  
55 living longer with chronic illness and disability. In Germany between 2013 and 2015 the  
56 number of nursing increased by 4.6%. In 2015, a number of 783,000 nursing home residents  
57 were observed. This is comparable with the situation in France. However, access to timely  
58 and appropriate medical care for NH residents is becoming increasingly challenging with  
59 frequency of home visits to nursing home residents rising in both regular and Out-of-Hours  
60 care (OOHC).<sup>1-4</sup> Provision of medical care to nursing home residents in Germany is  
61 predominantly provided by general practitioners (GPs), but this increasing demand for  
62 health care services is dovetailing with workforce shortages across the health professions  
63 including general practitioners. This is leading to gaps in care provision for NH-residents and  
64 an increasing burden in terms of workload for GPs, especially in rural areas.<sup>4,5</sup>

65 This is exacerbated by a further problem in terms of the knowledge base and skill sets of  
66 nursing staff traditionally educated to work in German nursing homes (*Altenpflege*). Laws  
67 governing the curriculum, i.e. required theoretical content and hours plus required clinical  
68 practice hours for the three-year *Altenpflege* vocational nursing training, have not been  
69 updated since 2003, but in the subsequent 15-years, care needs of nursing home residents  
70 have become increasingly more complex as people live longer with chronic illness and co-  
71 morbidities.<sup>6</sup> There is a distinct need for upskilling and expansion of the roles and  
72 responsibilities of nursing staff working in German nursing homes. Workforce shortages in  
73 this occupational group, as well as lacking competencies, result in an increased burden to  
74 nurses and contribute to potentially avoidable hospitalisations.<sup>7-9</sup> Meanwhile, nursing home

1  
2  
3 75 residents experience the consequences of these system issues at an individual level  
4  
5 76 including discomfort to themselves, potentially increased risk of morbidity due to iatrogenic  
6  
7  
8 77 events, potential deterioration of dementia or delirious behaviours not to mention the  
9  
10 78 financial implications related to potentially avoidable hospitalisations.<sup>10</sup>

11  
12  
13 79 NHs residents have been associated with high rates of emergency department (ED) visits  
14  
15  
16 80 and a high rate of hospitalisations, which is not just a problem in the German health care  
17  
18 81 system. Several international studies point in the direction that a large number  
19  
20  
21 82 hospitalisations for NH-residents are potentially avoidable.<sup>10-14</sup> Common conditions of  
22  
23 83 nursing home residents presenting to ED are pneumonia, falls with injuries, urinary tract  
24  
25  
26 84 infections, dehydration, partly as part of digestive problems often combined with pre-  
27  
28 85 existing dementia.<sup>15-18</sup> These all fall under the umbrella of 'ambulatory care-sensitive  
29  
30  
31 86 conditions' (ACSCs), which in the ICD-10 codes include the most prevalent conditions for  
32  
33 87 hospitalisations, which could potentially be handled on an outpatient basis.<sup>19</sup>

34  
35  
36 88 The aim of this study was to identify potentially avoidable hospitalisations (PAHs) of  
37  
38  
39 89 patients living in NHs and to compare these hospitalisations rates with the PAH rates of  
40  
41 90 patients living at home. We distinguished between planned and unplanned hospitalisations  
42  
43  
44 91 (UHs). Our hypothesis was that the rate of PAHs from NHs and thereof the UHs would be  
45  
46 92 significantly higher than of patients living at home.

## 47 48 49 93 **Methods**

### 50 51 52 94 *Setting, Design and Participants*

53  
54  
55  
56  
57

1  
2  
3 95 Inpatient diagnoses of insured individuals living at home and of residents living in nursing  
4  
5 96 homes supplied by the AOK (“Allgemeine Ortskrankenkasse”), a statutory health insurance  
6  
7  
8 97 company within the Federal State Baden-Wuerttemberg were analysed in order to  
9  
10 98 determine PAHs. All inpatient ICD-10 diagnoses in 2015 were screened for an established  
11  
12  
13 99 set of ACSCs compiled by health services researchers of the Department of General Practice  
14  
15 100 and Health Services Research, University Hospital Heidelberg according to already published  
16  
17  
18 101 lists of ACSCs.<sup>19-21</sup> The included conditions are shown in the Supplemental Table 1.

19  
20  
21 102 Data were derived from a comprehensive evaluation programme in German primary care,  
22  
23 103 the *Hausarztzentrierte Versorgung* (HZV), loosely translated as “family doctor coordinated  
24  
25 104 care”. The HZV is a programme encouraging patients to enrol with a family doctor pursuant  
26  
27  
28 105 to Section 73b, Volume V of the German Social Security Law. It came into effect in Baden-  
29  
30  
31 106 Wuerttemberg on July 1st, 2008. The HZV is aimed at enhancing health care for patients  
32  
33 107 with chronic diseases and complex health care needs e. g. those requiring long-term care.<sup>22</sup>

34  
35  
36 108 In Germany, the rules for determining level of care for all patients depend on the severity of  
37  
38  
39 109 disease and multi-morbidity. The level of care category assigned then determines the  
40  
41 110 financial support available for continuous care from the health care insurance providers.<sup>23</sup>

42  
43  
44 111 Until 2016, patients could be categorised into one of four levels of care from 0 to 3. These  
45  
46 112 levels include assessed needs for both basic nursing care and specialised medical care. For  
47  
48 113 example, patients who required basic nursing care of less than 0.75 hours per day were  
49  
50  
51 114 categorised in level 0, patients who needed more than four hours basic nursing care per day  
52  
53 115 and additionally required complex medical care were categorised in level 3. Since 2017, the

1  
2  
3 116 level of care categories have been extended from 0 to 5 in order to include patients with  
4  
5 117 incipient and advanced dementia who are otherwise physically healthy.<sup>24</sup>  
6  
7

8  
9 118 The new outpatient models of care introduced by the NHS in England for patients with long  
10  
11 119 term conditions may be approximately comparable with the models of care in Germany.  
12

13 120 The five vital areas of long-term conditions (LTCs) described in these social models of care  
14  
15  
16 121 correspond to the items of level of care classification in Germany. The implementation of  
17  
18 122 the models of care in daily routine are currently examined and evaluated in different  
19  
20  
21 123 vanguards spread across England.<sup>25-27</sup>  
22  
23

24 124

25  
26  
27 125 *Data*  
28

29  
30 126 The eligible study population consisted of 3.872 million individuals with statutory health  
31  
32 127 insurance from AOK. The insurance claims data included diagnosis, date of hospitalisation,  
33  
34 128 age, sex and nationality of the individuals. An UH could be identified in the forms of  
35  
36  
37 129 hospitalisation recorded in the available dataset by the health insurance company. Age,  
38  
39  
40 130 gender and nationality were available for every patient within the dataset. Based on the  
41  
42 131 ICD-10, it was possible to determine the “Charlson-Index” in order to approximate patients’  
43  
44  
45 132 overall morbidity. There are particular diagnoses corresponding to more severe conditions.  
46  
47 133 Values between 1 and 6 are assigned for those diagnoses. Finally, a sum score is  
48  
49  
50 134 determined for each individual. The underlying calculus is described in detail elsewhere.<sup>28</sup>  
51  
52

53 135 Data storage and extraction was performed with MySQL Community Server x64 (Oracle  
54  
55 136 Corporation, Redwood Shores, CA, USA).  
56  
57

1  
2  
3 1374  
5  
6 1387  
8  
9 13910  
11  
12 140 *Statistical Methods*

13  
14  
15 141 Multivariable analyses were performed with regard to patients' age, gender, nationality,  
16 142 morbidity and the binary variable for participation in the HZV intervention. Moreover, level  
17 143 of care for each patient in the multivariable model was included.

18  
19  
20 144 In order to calculate frequencies, rates and percentages we used SAS PROC SQL. In order to  
21 145 assess the adjusted outcomes of interest, we used SAS PROC GENMOD (SAS 9.4 x64, SAS  
22 146 Institute Inc., Cary, NC, USA).<sup>29</sup>

23  
24  
25 147 For all analyses, results were considered statistically significant if the p value was 0.05 or  
26 148 less.

27  
28  
29 149 *Outcomes*

30  
31  
32 150 PAHs of individuals living at home and of individuals living in nursing homes were the  
33 151 primary outcome measures in this study. The comparison of planned and unplanned  
34 152 hospitalisations was an additional outcome.

35  
36  
37 153 *Ethics*

38  
39  
40 154 Ethical approval for the study was given by the University Hospital Heidelberg Ethics  
41 155 Committee (No. S-359/2013).

156 *Patient and public involvement*

157 Patients of the study could not be informed and involved because we used pseudonymised  
 158 data. It was not possible to identify patients. The dissemination of the results will be  
 159 performed by publications publicly accessible.

160

161 **Results**

162 *Observed Sample*

163 The sample drawn from the AOK statutory health insurance provider dataset included  
 164 13,478 hospitalised patients from an overall population of 31,079 nursing home residents  
 165 and 560,998 hospitalised patients from an overall population of 3,841,166 AOK insured  
 166 persons living at home (Table 1).

167 Table 1. Observed Sample, Unadjusted hospitalisation patterns

|                                                  | Patients living    |                         | P-Value  |
|--------------------------------------------------|--------------------|-------------------------|----------|
|                                                  | ...in Nursing Home | ... not in Nursing Home |          |
| Number of patients                               | 31,079             | 3,841,166               | -        |
| Number of hospitalised patients                  | 13,478             | 560,998                 | -        |
| Number of admissions and readmissions            | 23,982             | 909,260                 | -        |
| Hospitalisation rate (per 100 patients per year) | 77.16              | 23.67                   | < 0.0001 |
| PAHs (n, %)                                      | 6,449 (26.89%)     | 136,543 (15.02%)        | < 0.0001 |
| UHs (n, %)                                       | 15,647 (65.24%)    | 398,167 (43.79%)        | < 0.0001 |

168

169 *Description of the included population*

170 Mean age of hospitalised patients living in nursing homes was  $80.58 \pm 13.31$  years with  
 171 significantly more women in this group than in the patient group living at home (68.56%  
 172 versus 53.64%). In comparison, the mean age of the hospitalised patients living at home  
 173 was  $55.52 \pm 24.66$  years. Hospitalised nursing home patients suffered from more chronic



174 diseases. In this study, level of care category for nursing home patients was significantly  
 175 higher than for patients living at home ( $1.82 \pm 0.76$  versus  $0.17 \pm 0.52$ ). HZV enrolment  
 176 (“family doctor coordinated care”) for hospitalised nursing home patients was somewhat  
 177 lower than for hospitalised patients living at home (Table 2).

178

179 Table 2. Demographics of hospitalised patients

|                                       | Patients living    |                         | P-Value  |
|---------------------------------------|--------------------|-------------------------|----------|
|                                       | ...in Nursing Home | ... not in Nursing Home |          |
| Number of Patients                    | 13,478             | 560,998                 | -        |
| Age (AVG $\pm$ SD)                    | $80.58 \pm 13.31$  | $55.52 \pm 24.66$       | < 0.0001 |
| Gender (% female)                     | 68.56%             | 53.64%                  | < 0.0001 |
| Morbidity (AVG $\pm$ SD)              | $4.32 \pm 2.76$    | $2.23 \pm 2.65$         | < 0.0001 |
| Level of Care Category (AVG $\pm$ SD) | $1.82 \pm 0.76$    | $0.17 \pm 0.52$         | < 0.0001 |
| HZV Enrolment (% participation)       | 31.19%             | 38.88%                  | < 0.0001 |

180

181 *Hospitalisations patterns*

182 In total, 23,982 hospitalisations of patients living in nursing homes and 909,260  
 183 hospitalisations of patients living at home were evaluated for the 2015 period. This means a  
 184 hospitalisation rate of 77.16% versus 23.67% in the two different study groups. 15,647  
 185 hospitalisations of the nursing home patients were either OOHC-hospitalisations or  
 186 hospitalisations due to an emergency (65.24%). In comparison, 398,167 of the 909,260  
 187 hospitalisations of patients living at home were unplanned (43.79%). This was a significantly  
 188 higher proportion of UHs for nursing home residents in comparison to patients living at  
 189 home (Table1).

190 *Comparison of Ambulatory Care Sensitive Conditions (ACSCs) of nursing home patients and*  
 191 *patients living at home*

192 6,449 PAHs of nursing home patients (26.9%) and 136,543 PAHs of patients living at home  
 193 (15.02%) were identified. Comparing the two study populations, there was a significant  
 194 increase in the relative rate (79.03%) of ACSCs in the nursing home group. The adjusted  
 195 odds ratios for patients living in nursing homes were significantly higher than the patient  
 196 group living at home for PAHs as for UHs (Table 3). This means the adjusted chance for a  
 197 PAH was nearly 22% higher for patients living in a nursing home and the adjusted chance of  
 198 UHs was more than 50% higher for patients living in a nursing home compared with  
 199 patients living at home.

200 In addition, 90.87% of PAHs with ACSCs were not in the category of planned  
 201 hospitalisations. By implication, less than 10% of PAHs were planned hospitalisations.

202 Table 3. Adjusted odds ratios for hospitalisation target variables. (Nursing home patients  
 203 versus patients living at home)

|      | Odds Ratio | 95%-CI         | P-Value  |
|------|------------|----------------|----------|
| PAHs | 1.218      | [1.179, 1.258] | < 0.0001 |
| UHs  | 1.514      | [1.470, 1.559] | < 0.0001 |

204  
 205  
 206 The top ten PAHs according to ACSC category for both groups are shown in Table 4.  
 207 Pneumonia (J18), Fracture of Femur (S72), Volume depletion E86) and Epilepsy (G40)  
 208 occurred noticeably more often in nursing home patients.

209 Table 4. Top ten PAHs according to ACSC category.

| Nursing Home Patients |             |               |       |       | Non Nursing Home Patients |             |                  |        |       |
|-----------------------|-------------|---------------|-------|-------|---------------------------|-------------|------------------|--------|-------|
| Rank                  | ICD-10 Code | Diagnosis     | n     | %     | Rank                      | ICD-10 Code | Diagnosis        | n      | %     |
| 1                     | J18         | Pneumonia     | 1,196 | 18.52 | 1                         | I50         | Heart failure    | 21,775 | 15.94 |
| 2                     | I50         | Heart failure | 1,137 | 17.61 | 2                         | F10         | Disorders due to | 16,204 | 11.86 |

| Nursing Home Patients |             |                                       |     |       | Non Nursing Home Patients |             |                                  |        |      |
|-----------------------|-------------|---------------------------------------|-----|-------|---------------------------|-------------|----------------------------------|--------|------|
| Rank                  | ICD-10 Code | Diagnosis                             | n   | %     | Rank                      | ICD-10 Code | Diagnosis                        | n      | %    |
| 3                     | S72         | Fracture of femur                     | 827 | 12.81 | 3                         | J18         | Pneumonia                        | 12,195 | 8.93 |
| 4                     | E86         | Volume depletion                      | 588 | 9.11  | 4                         | I20         | Angina pectoris                  | 11,474 | 8.40 |
| 5                     | G40         | Epilepsy                              | 549 | 8.50  | 5                         | I10         | Essential (primary) hypertension | 9,574  | 7.01 |
| 6                     | E11         | Type 2 diabetes mellitus              | 332 | 5.14  | 6                         | S72         | Fracture of femur                | 6,868  | 5.03 |
| 7                     | J20         | Acute bronchitis                      | 278 | 4.31  | 7                         | E11         | Type 2 diabetes mellitus         | 6,262  | 4.58 |
| 8                     | K21         | Gastro-oesophageal reflux disease     | 180 | 2.79  | 8                         | G40         | Epilepsy                         | 6,189  | 4.53 |
| 9                     | I10         | Essential (primary) hypertension      | 170 | 2.63  | 9                         | J20         | Acute bronchitis                 | 4,654  | 3.41 |
| 10                    | K59         | Other functional intestinal disorders | 120 | 1.86  | 10                        | E86         | Volume depletion                 | 4,434  | 3.25 |

210

211

212

## 213 Discussion

214 The analysis of the AOK statutory health insurance provider dataset identified numerous  
 215 PAHs especially in the context of UHs (including emergency and OOHC). 23,982  
 216 hospitalisations of nursing home patients and 909,260 hospitalisations of patients living at  
 217 home occurred in 2015. Comparing the number of PAHs in both patient groups, the  
 218 adjusted odds ratios for PAHs were significantly higher in the NH group. More than 90% of  
 219 PAHs in nursing homes with ACSCs were UHs. Our study design did not allow for remarks  
 220 about sociodemographic data of the study population, which could perhaps influence our  
 221 results. In addition, information on the staffing ratio or the education of the nursing home  
 222 staff was not available to us. With regard to the currently increasing workforce shortages in  
 223 German nursing homes and the increasingly high workload of GPs, we consider that these  
 224 could be key factors contributing to the significantly higher PAHs in nursing homes.<sup>6,30</sup>

1  
2  
3 225 Our results are in accordance with several other international studies, which in particular  
4  
5 226 identify the need for improved continuity of care for people in nursing homes.<sup>10,12-15,31</sup>  
6  
7  
8 227 Haber et al. showed in their study that consistency of the relationship between GP and  
9  
10 228 nursing home patient was an important factor of reducing PAHs and of reducing OOHC or  
11  
12 229 ED visits, which often result in UHs.<sup>32</sup> It is of great importance that the primary medical  
13  
14 230 practitioners (usually GPs) know the medical history of their patients who are nursing home  
15  
16 231 residents. This is for a number of reasons. Firstly, to ensure optimal care management of  
17  
18 232 patient health needs; secondly, to coordinate care between providers as well as to  
19  
20 233 anticipate potential deterioration of patient health conditions and finally, to therefore  
21  
22 234 reduce unnecessary utilisation of acute hospital services.<sup>10,33</sup>  
23  
24  
25  
26  
27  
28 235 NH patients with ACSCs who do not have a primary health care provider in regular  
29  
30 236 attendance will be potentially frequent attenders in OOHC and EDs.<sup>34,35</sup> The overcrowding  
31  
32 237 of OOHC centres and EDs is as well as PAHs (normally UHs) of NH patients are stretching  
33  
34 238 resources to the limits in health care systems of many European countries and the United  
35  
36 239 States of America.<sup>36,37</sup> Frequent attenders or patients with minor ailments are in large part  
37  
38 240 responsible for the high workload of physicians and staff in OOHC and EDs. Consultations of  
39  
40 241 these patients with perhaps minor ailments in OOHC or EDs should be avoided, except for  
41  
42 242 the most urgent or complex cases.<sup>38-40</sup> However, this is creating the need for new  
43  
44 243 approaches to conditions such as pneumonia, falls risk (e.g. to prevent fracture of femur),  
45  
46 244 volume depletion and epilepsy, which are four of the most frequent diagnoses connected  
47  
48 245 with PAHs in our study and common problems in nursing homes.<sup>16,41,42</sup>  
49  
50  
51  
52  
53  
54  
55  
56  
57  
58  
59  
60

1  
2  
3 246 There is little doubt on, a case-by-case basis, that such listed conditions may be severe  
4  
5 247 diseases without the possibility of being treated in an outpatient setting. But prophylactic  
6  
7  
8 248 and monitoring procedures for these conditions are possible and do not seem to be too  
9  
10 249 complex in the first instance. However, individually tailored prophylactic and monitoring  
11  
12  
13 250 procedures for nursing home residents are resource intensive in terms of both time and  
14  
15 251 staff and, due to resource constraints and workforce shortages, are a major cause of  
16  
17  
18 252 current deficiencies in care provision.

19  
20  
21 253 Considering the increasing shortages of GPs, especially in rural areas, as well as increasing  
22  
23 254 shortages of appropriately trained nursing home staff, health policies and health services  
24  
25  
26 255 experts have to look for innovative approaches to ease the health care services crisis  
27  
28 256 emerging in nursing homes. Therefore, additional measures to be pursued are that the  
29  
30  
31 257 education of nursing home staff should be reviewed and improved and nursing staff should  
32  
33 258 be formally empowered to manage minor ailments e.g. like fever and pain in the first  
34  
35  
36 259 instance. Unfortunately, government regulations in Germany currently prohibit in many  
37  
38 260 cases independent clinical decisions of nursing staff in nursing homes. The daily work of  
39  
40  
41 261 nursing staff and medical practitioners is made difficult because of such regulations are no  
42  
43 262 longer in keeping with the tensions and demands in clinical practice in these settings.<sup>43,44</sup>

44  
45  
46 263

47  
48  
49 264

50  
51  
52 265 In Germany, the current government has introduced a new workforce policy to address the  
53  
54  
55 266 pressing problem of staff shortages and agreed to fund 8,000 new geriatric nurses

1  
2  
3 267 (*Altenpflege*) with enhanced competencies for nursing homes through the statutory health  
4  
5 268 insurance.<sup>30</sup> The policy for upskilling a segment of the geriatric nursing workforce is one  
6  
7  
8 269 important step but will not bring immediate improvements to coordination of care and  
9  
10 270 information flow between the different providers across health care sectors. PAHs of  
11  
12 271 nursing home residents and effective outpatient management remain complex problems  
13  
14  
15 272 that must be dealt with in parallel on many fronts.

16  
17  
18 273 The complex difficulties in improving the care of nursing home residents were shown in the  
19  
20 274 INTERACT-program (Interventions to reduce Acute Care Transfers) a randomised  
21  
22  
23 275 prospective study. Despite training and support of the staff, the objectives of reducing  
24  
25  
26 276 hospital admissions or ED visits for NH residents were not achieved.<sup>43</sup> Kane et al. explain the  
27  
28 277 lack of effectiveness are being due to a multitude of interacting factors: Quality of the NH  
29  
30  
31 278 staff, lacking continuous medical care, concerns over liability and poor motivation to reduce  
32  
33 279 hospitalisations in nursing home patients.<sup>43</sup>

34  
35  
36 280 Perhaps in future service providers such as nurse practitioners, medical assistants - in  
37  
38 281 Germany VERAH (*Versorgungsassistentin in der Hausarztpraxis*) - palliative care teams,  
39  
40  
41 282 geriatric specialist services may support primary care providers (GPs) and nursing home  
42  
43  
44 283 staff in improving medical care and reducing PAHs of nursing home residents.<sup>10,45-47</sup>  
45  
46 284 However, the proven effects of these new models or interventions remains low and should  
47  
48 285 be studied further.<sup>47</sup>

49  
50  
51 286 A further initiative by the German government has been the introduction of the "Innovation  
52  
53  
54 287 Fund". With this programme, health services research projects are subsidised, and this  
55  
56  
57 288 includes among others, pilot projects to improve the care of nursing home residents and to

1  
2  
3 289 reduce PAHs. It remains to be seen, if the results of these projects translate to improved  
4  
5 290 responsiveness to the needs of nursing home residents.<sup>48-50</sup>  
6  
7

8  
9 291 Finally, the issue of remuneration needs to be addressed. High workloads, dealing with the  
10  
11 292 impacts of staff shortages and increasingly complex patient care requirements in the  
12  
13 293 primary care sector, place a burden on the existing workforce. GPs, other specialists and  
14  
15 294 nursing staff should also be remunerated adequately and advanced training to upskill staff  
16  
17 295 should be incentivised. In that respect, NHs, insurance companies and the government are  
18  
19 296 called upon to give financial incentives.<sup>4,10,51,52</sup>  
20  
21  
22  
23

24 297

## 25 26 298 **Conclusions**

27  
28 299 A high rate of PAHs, which may be predominantly UHs (OOHC/ED) for nursing home  
29  
30 300 residents could suggest that the traditional approach to health care provision in NHs needs  
31  
32 301 improvement. At the individual level, physicians in primary care and OOHC and the staff in  
33  
34 302 NHs have to be sensitised to manage common health problems of patients that too often  
35  
36 303 result in PAHs. There is little doubt that the management of diseases with ACSCs is a  
37  
38 304 complex problem. These problems need case-by-case decisions, to determine whether they  
39  
40 305 are best managed in outpatient or in-patient settings. We consider prerequisites for  
41  
42 306 improved inter-sectoral collaboration are sufficient numbers of nursing home staff,  
43  
44 307 upskilled with today's needed competencies and GPs/primary care medical specialists who  
45  
46 308 are motivated to upskill in geriatric health care. Finally, at a system level, policy makers and  
47  
48 309 regulators of the health professions need to use incentives and remuneration programs to  
49  
50  
51  
52  
53  
54  
55  
56  
57

1  
2  
3 310 achieve the ambitious goals of improving nursing home care and reducing PAHs -  
4  
5  
6 311 predominantly UHs - of nursing home residents.  
7

8  
9 312 **Author Contributions** GL, JS and RL initiated and designed the study. GL and RL coordinated  
10 313 the study. GL carried out data analysis. RL, SB (native English speaker) and GL wrote the  
11 314 manuscript. All authors (RL, SB, JS and GL) commented on the draft and approved the final  
12 315 version of the manuscript.  
13

14 316 **Funding** This research received no specific grant from any funding agency in the public,  
15 317 commercial or not-for-profit-sectors.  
16

17  
18 318 **Acknowledgement** The data usage grant from the AOK Baden-Wuerttemberg for this study  
19 319 is greatly acknowledged.  
20

21 320 **Competing interests** None declared  
22

23 321 **Patient consent** Not required  
24

25 322 **Data sharing statements** Data used in this analysis are not in the public domain an use was  
26 323 covered by data sharing agreements with the AOK Baden-Wuerttemberg.  
27

28 324  
29

30 325  
31

32 326  
33

## 34 327 **References**

- 35  
36 328 1. Pflegestatistik- Statistisches Bundesamt  
37 329 [https://www.destatis.de/DE/Publikationen/Thematisch/Gesundheit/Pflege/PflegeDeutschl  
39 330 hlandergebnisse5224001159004.pdf?\\_\\_blob=publicationFile](https://www.destatis.de/DE/Publikationen/Thematisch/Gesundheit/Pflege/PflegeDeutschl<br/>38 330 hlandergebnisse5224001159004.pdf?__blob=publicationFile)  
40 331 (Acessed on 06-Jul-2018)  
41 332 2. Bedarfsgerechte Versorgung Sachverständigengutachten 2014  
42 333 [http://www.svr-gesundheit.de/fileadmin/user\\_upload/Gutachten/  
44 334 2014/Zusammenfassung\\_GA\\_2014.pdf](http://www.svr-gesundheit.de/fileadmin/user_upload/Gutachten/<br/>43 334 2014/Zusammenfassung_GA_2014.pdf). (Accessed on 06-JUL-2018)  
45 335 3. Atramont A, Bourdel-Marchasson I, Bonnet-Zamponi D, Tangre I, Fagot-Campagna  
46 336 A, Tuppin P. Impact of nursing home hospitalization on health care use and  
47 337 disease status elderly dependent people one year before and one year after  
48 337 skilled nursing home hospitalization based on 2012-2013 SNIIRAM data. BMC  
49 338 Health Serv Res 2017;17(1):667.  
50 339 4. Groom L, Avery AJ, Boot D, O'Neill C, Thornhill K, Brown K, Jones R. The impact of  
51 340 nursing home patients on general practitioners' workload. Br J Gen Pract  
52 341 2000;50(455):473-6.  
53 342  
54  
55  
56  
57  
58  
59  
60



- 1  
2  
3 343 5. McDermott C, Coppin R, Little P, Leydon G. Hospital hospitalizations from nursing  
4 344 homes: a qualitative study of GP decision making. *Br J Gen Pract*  
5 345 2012;62(601):e538-45.
- 6 346 6. Bundesministerium für Familie, Senioren, Frauen und Jugend.  
7 347 Altenpflegegesetz des Bundes.  
8 348 [https://www.altenpflegeausbildung.net/fachinformationen/altenpflegegesetz-  
10 348 des-bundes.html](https://www.altenpflegeausbildung.net/fachinformationen/altenpflegegesetz-<br/>9 349 des-bundes.html) (Accessed on 06-JUL-2018)
- 11 349 7. Bleckwenn M, Ashrafnia D, Schnakenberg R, Weckbecker K. [Urgent Visits to  
12 350 Nursing Homes: A General Practitioner's Perspective]. *Gesundheitswesen*  
13 351 2017;doi: 10.1055/s-0043-110852.
- 14 352 8. Bleckwenn M, Bell L, Schnakenberg R, Weckbecker K, Klaschik M. [Outpatient  
15 353 Emergency Care for Nursing Home Residents: A Status Quo from a Nursing  
16 354 Perspective]. *Gesundheitswesen* 2018;doi: 10.1055/a-0592-6475 (in press).
- 17 355 9. Rommel A, Kottner J, Suhr R, Lahmann N. [Frequency of falls among clients of  
18 356 home care services: The importance of care-related and social risk factors].  
19 357 *Z Gerontol Geriatr* 2017;doi: 10.1007/s00391-017-1215-5 (in press).
- 20 358 10. Ouslander JG, Lamb G, Perloe M, Givens JH, Kluge L, Rutland T, Atherly A, Saliba D.  
21 359 Potentially avoidable hospitalizations of nursing home residents: frequency,  
22 360 causes, and costs: [see editorial comments by Drs. Jean F. Wyman and William R.  
23 361 Hazzard, pp 760-761]. *J Am Geriatr Soc* 2010;58(4):627-35.
- 24 362 11. Grabowski DC, O'Malley AJ, Barhydt NR. The costs and potential savings  
25 363 associated with nursing home hospitalizations. *Health Aff (Millwood)* 2007;  
26 364 26(6):1753-61
- 27 365 12. Walker JD, Teare GF, Hogan DB, Lewis S, Maxwell CJ. Identifying potentially  
28 366 avoidable hospital hospitalizations from canadian long-term care facilities. *Med*  
29 367 *Care* 2009;47(2):250-4.
- 30 368 13. Wyman JF, Hazzard WR. Preventing avoidable hospitalizations of nursing home  
31 369 residents: a multipronged approach to a perennial problem. *J Am Geriatr Soc*  
32 370 2010;58(4):760-1.
- 33 371 14. Van Rensbergen G, Nawrot T. Medical conditions of nursing home  
34 372 hospitalizations. *BMC Geriatr* 2010;10:46
- 35 373 15. Carron PN, Mabire C, Yersin B, Büla C. Nursing home residents at the Emergency  
36 374 Department: a 6-year retrospective analysis in a Swiss academic hospital. *Intern*  
37 375 *Emerg Med* 2017;12(2):229-237
- 38 376 16. Briggs R, Coughlan T, Collins R, O'Neill D, Kennelly SP. Nursing home residents  
39 377 attending the emergency department: clinical characteristics and outcomes. *QJM*  
40 378 2013;106(9):803-8.
- 41 379 17. Carron PN, Mabire C, Yersin B, Büla C. Nursing home residents at the Emergency  
42 380 Department: a 6-year retrospective analysis in a Swiss academic hospital. *Intern*  
43 381 *Emerg Med* 2017;12(2):229-237.  
44 382

- 1  
2  
3 383 18. Dwyer R, Gabbe B, Stoelwinder JU, Lowthian J. A systematic review of outcomes  
4 384 following emergency transfer to hospital for residents of aged care facilities. *Age*  
5 385 *Ageing* 2014;43(6):759-66.  
6 386  
7 386 19. Purdy S, Griffin T, Salisbury C, Sharp D. Ambulatory care sensitive conditions:  
8 387 terminology and disease coding need to be more specific to aid policy makers and  
9 388 clinicians. *Public Health* 2009;123(2):169-73.  
10 389  
11 389 20. Freund T, Campbell SM, Geissler S, Kunz CU, Mahler C, Peters-Klimm F, Szecsenyi  
12 390 J. Strategies for reducing potentially avoidable hospitalizations for ambulatory  
13 391 care-sensitive conditions. *Ann Fam Med* 2013;1(4):363-7.  
14 392  
15 392 21. Sundmacher L, Fischbach D, Schuettig W, Naumann C, Augustin U, Faisst C. Which  
16 393 hospitalisations are ambulatory care-sensitive, to what degree, and how could the  
17 394 rates be reduced? Results of a group consensus study in Germany. *Health Policy*  
18 395 *2015;119(11):1415-23.*  
19 396  
20 396 22. Laux G, Kaufmann-Kolle P, Bauer E, Goetz K, Stock C, Szecsenyi J. Evaluation of  
21 397 family doctor centred medical care based on AOK routine data in Baden-  
22 398 Wuerttemberg. *Z Evid Fortbild Qual Gesundhwes* 2013;107(6):372-8.  
23 399  
24 399 23. Bundesgesundheitsministerium. Online-Ratgeber Pflege.  
25 400 [https://www.bundesgesundheitsministerium.de/themen/pflege/online-ratgeber-](https://www.bundesgesundheitsministerium.de/themen/pflege/online-ratgeber-pflege/pflegebeduerftigkeit.html)  
26 401 [pflege/pflegebeduerftigkeit.html](https://www.bundesgesundheitsministerium.de/themen/pflege/online-ratgeber-pflege/pflegebeduerftigkeit.html) (Accessed on 06-JUL-2018).  
27 402  
28 402 24. Bundesgesundheitsministerium. Meldungen 2016-Neuregelungen 2017.  
29 403 [https://www.bundesgesundheitsministerium.de/ministerium/meldungen/2016/n-](https://www.bundesgesundheitsministerium.de/ministerium/meldungen/2016/neuregelungen-2017.html)  
30 404 [euregelungen-2017.html](https://www.bundesgesundheitsministerium.de/ministerium/meldungen/2016/neuregelungen-2017.html) (Accessed on 06-JUL-2018)  
31 405  
32 405 25. Goodwin N, Curry N, Naylor C, Ross S, Duldig W. Managing people with  
33 406 long-term conditions.  
34 407 [https://www.kingsfund.org.uk/sites/default/files/field/field\\_](https://www.kingsfund.org.uk/sites/default/files/field/field_document/managing)  
35 408 [-people-long-term-conditions-gp-inquiry-research-paper-mar11.pdf](https://www.kingsfund.org.uk/sites/default/files/field/field_document/managing)  
36 409 (Accessed on 06-JUL-2018)  
37 409  
38 410 26. NHS. Next steps on the NHS five year forward view  
39 411 <https://www.england.nhs.uk/wp-content/uploads/2017/03/NEXT-STEPS-ON-THE->  
40 412 [NHS-FIVE-YEAR-FORWARD-VIEW.pdf](https://www.england.nhs.uk/wp-content/uploads/2017/03/NEXT-STEPS-ON-THE-) (Accessed 06-JUL-2018)  
41 413  
42 413 27. Watson L. New models of care programme for PACs and MCPs  
43 414 [https://www.kingsfund.org.uk/sites/default/files/media/Louise\\_](https://www.kingsfund.org.uk/sites/default/files/media/Louise_Watson.pdf)  
44 415 [Watson.pdf](https://www.kingsfund.org.uk/sites/default/files/media/Louise_Watson.pdf)  
45 416 (Accessed 06-JUL-2018)  
46 417  
47 417 28. Sundararajan V, Henderson T, Perry C, Muggivan A, Quan H, Ghali WA. New  
48 418 ICD-10 version of the Charlson comorbidity index predicted in-hospital mortality. *J*  
49 419 *Clin Epidemiol* 2004;57:1288-94.  
50 420  
51 420 29. PROC GENMOD Statement. SAS User's Guide, Second Edition.  
52 421 [http://support.sas.com/documentation/cdl/en/statug/63347/HTML/default/view-](http://support.sas.com/documentation/cdl/en/statug/63347/HTML/default/viewer.htm#statug_genmod_sect010.html)  
53 421 [er.htm#statug\\_genmod\\_sect010.html](http://support.sas.com/documentation/cdl/en/statug/63347/HTML/default/viewer.htm#statug_genmod_sect010.html). (Accessed 06-JUL-2018).  
54  
55  
56  
57  
58  
59  
60

- 1  
2  
3 422 30. Koalitionsvertrag zwischen CDU, CSU und SPD 19. Legislaturperiode 2018.  
4 423 [https://www.bundesregierung.de/Content/DE/\\_Anlagen/2018/03/2018-03-14-](https://www.bundesregierung.de/Content/DE/_Anlagen/2018/03/2018-03-14-koalitionsvertrag.pdf)  
5 424 [koalitionsvertrag.pdf](https://www.bundesregierung.de/Content/DE/_Anlagen/2018/03/2018-03-14-koalitionsvertrag.pdf). (Accessed 06-JUL-2018).  
6  
7 425 31. Brownell J, Wang J, Smith A, Stephens C, Hsia RY. Trends in emergency  
8 426 department visits for ambulatory care sensitive conditions by elderly nursing  
9 427 home residents, 2001 to 2010. *JAMA Intern Med* 2014;174(1):156-8.  
10  
11 428 32. Haber SG, Wensky SG, McCall NT. Reducing Inpatient Hospital and Emergency  
12 429 Room Utilization Among Nursing Home Residents. *J Aging Health* 2017 (3):510-  
13 430 530.  
14  
15 431 33. Konetzka RT, Stearns SC, Park J. The staffing-outcomes relationship in nursing  
16 432 homes. *Health Serv Res* 2008;43(3):1025-42.  
17  
18 433 34. Buja A, Fusco M, Furlan P, Bertoncetto C, Baldovin T, Casale P, Marcolongo A,  
19 434 Baldo V. Referral patterns in elderly emergency department visits. *Ann Ist Super*  
20 435 *Sanita* 2013;49(4):395-401.  
21  
22 436 35. Lukin B, Fan LJ, Zhao JZ, Sun JD, Dingle K, Purtill R, Tapp S, Hou XY. Emergency  
23 437 department use among patients from residential aged care facilities under a  
24 438 Hospital in the Nursing Home scheme in public hospitals in Queensland Australia.  
25 439 *World J Emerg Med* 2016;7(3):183-90.  
26  
27 440 36. Margolius D, Bodenheimer T. Redesigning after-hours primary care [Editorial]. *Ann*  
28 441 *Intern Med* 2011;155:131-2.  
29  
30 442 37. Majeed A . Redesigning after-hours primary care. *Ann Intern Med* 2012;156: 67-8.  
31 443 38. Leutgeb R, Engeser P, Berger S, Szecsenyi J, Laux G. Out of hours care in Germany -  
32 444 High utilization by adult patients with minor ailments? *BMC Fam Pract*  
33 445 2017;18(1):42.  
34  
35 446 39. Jacob R, Wong ML, Hayhurst C, Watson P, Morrison C. Designing services for  
36 447 frequent attenders to the emergency department: a characterisation of this  
37 448 population to inform service design. *Clin Med (Lond)* 2016;16(4):325-9.  
38  
39 449 40. den Boer-Wolters D, Knol MJ, Smulders K, de Wit NJ. Frequent attendance of  
40 450 primary care out-of-hours services in the Netherlands: characteristics of patients  
41 451 and presented morbidity. *Fam Pract* 2010;27(2):129-34.  
42  
43 452 41. Büchele G, Becker C, Cameron ID, König HH, Robinovitch S, Rapp K. Predictors of  
44 453 serious consequences of falls in residential aged care: analysis of more than  
45 454 70,000 falls from residents of Bavarian nursing homes. *J Am Med Dir Assoc*  
46 455 2014;(8):559-63.  
47  
48 456 42. Aymes S. Neurology Advisor: Epilepsy, Seizures Common Among Nursing Home  
49 457 Population.  
50 458 [https://neurologyadvisor.com/epilepsy/epilepsy-seizures-common-in-nursing-](https://neurologyadvisor.com/epilepsy/epilepsy-seizures-common-in-nursing-home-elderly/article/643330)  
51 459 [home-elderly/article/643330](https://neurologyadvisor.com/epilepsy/epilepsy-seizures-common-in-nursing-home-elderly/article/643330) (Accessed 06-JUL-2018).  
52  
53 460 43. Kane RL, Huckfeldt P, Tappen R, Engstrom G, Rojido C, Newman D, Yang Z,  
54 461 Ouslander JG. Effects of an Intervention to Reduce Hospitalizations From Nursing

- 1  
2  
3 462 Homes: A Randomized Implementation Trial of the INTERACT Program. JAMA  
4 463 Intern Med 2017; 177(9):1257-1264.
- 5 464  
6 464 44. McDermott C, Coppin R, Little P, Leydon G. Hospital admissions from nursing  
7 465 homes: a qualitative study of GP decision making. Br J Gen Pract 2012;  
8 466 62(601):e538-45.
- 9 467  
10 467 45. Kane RL, Keckhafer G, Flood S et al. The effect of Evercare on hospital use. J Am  
11 468 Geriatr Soc 2003;51:1427-1434.
- 12 469  
13 469 46. VERAH (Versorgungsassistentin in der Hausarztpraxis). <https://www.verah.de/>.  
14 470 (Accessed 06-JUL-2018)
- 15 471  
16 471 47. Graverholt B, Forsetlund L, Jamtvedt G. Reducing hospital admissions from nursing  
17 472 homes: a systematic review. BMC Health Serv Res 2014;14:36.
- 18 473  
19 473 48. Gemeinsamer Bundesausschuss. Erweiterte ärztliche Pflegeheimversorgung.  
20 474 [https://innovationsfonds.g-ba.de/projekte/neue-versorgungsformen/cocare-](https://innovationsfonds.g-ba.de/projekte/neue-versorgungsformen/cocare-coordinated-medical-care-erweiterte-koordinierte-aerztliche-pflegeheimversorgung.70)  
21 475 [coordinated-medical-care-erweiterte-koordinierte-aerztliche-](https://innovationsfonds.g-ba.de/projekte/neue-versorgungsformen/cocare-coordinated-medical-care-erweiterte-koordinierte-aerztliche-pflegeheimversorgung.70)  
22 476 [pflegeheimversorgung.70](https://innovationsfonds.g-ba.de/projekte/neue-versorgungsformen/cocare-coordinated-medical-care-erweiterte-koordinierte-aerztliche-pflegeheimversorgung.70). (Accessed 06-JUL-2018).
- 23 477  
24 477 49. Gemeinsamer Bundesausschuss. Effekte von Strategien zur Verbesserung ärztlich-  
25 478 pflegerischer Zusammenarbeit auf Krankenhausaufnahmen von  
26 479 Pflegeheimbewohnern  
27 480 [https://innovationsfonds.g-ba.de/projekte/versorgungsforschung/interprof-act-](https://innovationsfonds.g-ba.de/projekte/versorgungsforschung/interprof-act-effekte-von-strategien-zur-verbesserung-aerztlich-pflegerischer-zusammenarbeit-auf-krankenhausaufnahmen-von-pflegeheimbewohnern.62)  
28 481 [effekte-von-strategien-zur-verbesserung-aerztlich-pflegerischer-zusammenarbeit-](https://innovationsfonds.g-ba.de/projekte/versorgungsforschung/interprof-act-effekte-von-strategien-zur-verbesserung-aerztlich-pflegerischer-zusammenarbeit-auf-krankenhausaufnahmen-von-pflegeheimbewohnern.62)  
29 482 [auf-krankenhausaufnahmen-von-pflegeheimbewohnern.62](https://innovationsfonds.g-ba.de/projekte/versorgungsforschung/interprof-act-effekte-von-strategien-zur-verbesserung-aerztlich-pflegerischer-zusammenarbeit-auf-krankenhausaufnahmen-von-pflegeheimbewohnern.62). (Accessed 06-JUL-  
30 483 2018).
- 31 484  
32 484 50. Gemeinsamer Bundesausschuss. Hospitalisierung und Notaufnahmebesuche von  
33 485 Pflegeheimbewohnern. Intervention zur Verbesserung der Versorgung.  
34 486 [https://innovationsfonds.g-ba.de/projekte/versorgungsforschung/homern-](https://innovationsfonds.g-ba.de/projekte/versorgungsforschung/homern-hospitalisierung-und-notaufnahmebesuche-von-pflegeheimbewohnern-haeufigkeit-ursachen-und-entwicklung-einer-intervention-zur-verbesserung-der-versorgung.54)  
35 487 [hospitalisierung-und-notaufnahmebesuche-von-pflegeheimbewohnern-](https://innovationsfonds.g-ba.de/projekte/versorgungsforschung/homern-hospitalisierung-und-notaufnahmebesuche-von-pflegeheimbewohnern-haeufigkeit-ursachen-und-entwicklung-einer-intervention-zur-verbesserung-der-versorgung.54)  
36 488 [haeufigkeit-ursachen-und-entwicklung-einer-intervention-zur-verbesserung-der-](https://innovationsfonds.g-ba.de/projekte/versorgungsforschung/homern-hospitalisierung-und-notaufnahmebesuche-von-pflegeheimbewohnern-haeufigkeit-ursachen-und-entwicklung-einer-intervention-zur-verbesserung-der-versorgung.54)  
37 489 [versorgung.54](https://innovationsfonds.g-ba.de/projekte/versorgungsforschung/homern-hospitalisierung-und-notaufnahmebesuche-von-pflegeheimbewohnern-haeufigkeit-ursachen-und-entwicklung-einer-intervention-zur-verbesserung-der-versorgung.54). (Accessed 06-JUL-2018).
- 38 490  
39 490 51. Gleeson LE, Jennings S, Gavin R, McConaghy D, Collins DR. Primary care in nursing  
40 491 homes revisited: survey of the experiences of primary care physicians. Ir Med J  
41 492 2014;107(8):234-6.
- 42 493  
43 493 52. Ashton T. Hospitalizations of nursing homes residents: the role of reimbursement  
44 494 policies. Isr J Health Policy Res 2014;3(1):3.
- 45 495  
46 496  
47 497  
48 498  
49 499

## Appendix

1  
2  
3 500 Supplement 1: List of ICD 10-GM Codes Used to Identify Hospitalizations for Ambulatory  
4 501 Care–Sensitive Conditions  
5  
6 502  
7  
8  
9  
10  
11  
12  
13  
14  
15  
16  
17  
18  
19  
20  
21  
22  
23  
24  
25  
26  
27  
28  
29  
30  
31  
32  
33  
34  
35  
36  
37  
38  
39  
40  
41  
42  
43  
44  
45  
46  
47  
48  
49  
50  
51  
52  
53  
54  
55  
56  
57  
58  
59  
60

For peer review only

## Supplement 1

**Supplemental Table 1. List of ICD 10-GM Codes Used to Identify Hospitalizations for Ambulatory Care–Sensitive Conditions**

| <i>Ambulatory Care Sensitive Condition</i>     | <i>ICD10-GM Code</i>                                                                              |
|------------------------------------------------|---------------------------------------------------------------------------------------------------|
| Angina                                         | I20, I24.0, I24.8, I24.9                                                                          |
| Asthma                                         | J45, J46                                                                                          |
| Cellulitis                                     | L03, L04, L08.0, L08.8, L08.9, L88, L98.0                                                         |
| Congestive heart failure                       | I11.0, I50, J81                                                                                   |
| Convulsion and epilepsy                        | G40, G41, R56, O15                                                                                |
| Chronic obstructive pulmonary disease          | J20, J41, J42, J43, J47                                                                           |
| Dehydration and gastroenteritis                | E86, K52.2, K52.8, K52.9                                                                          |
| Dental conditions                              | A69.0, K02, K03, K04, K05, K06, K08, K09.8, K09.9, K12, K13                                       |
| Diabetes complications                         | E10.0–E10.8, E11.0–E11.8, E12.0–E12.8, E13.0–E13.8, E14.0–E14.8                                   |
| Ear, nose and throat infections                | H66, H67, J02, J03, J06, J31.2                                                                    |
| Gangrene                                       | R02                                                                                               |
| Hypertension                                   | I10, I11.9                                                                                        |
| Influenza and pneumonia                        | J10, J11, J13, J14, J15.3, J15.4, J15.7, J15.9, J16.8, J18.1, J18                                 |
| Iron-deficiency anemia                         | D50.1, D50.8, D50.9                                                                               |
| Nutritional deficiency                         | E40, E41, E42, E43, E55.0, E64.3                                                                  |
| Other vaccine preventable diseases             | A35, A36, A37, A80, B05, B06, B16.1, B16.9, B18.0, B18.1, B26, G00.0, M01.4                       |
| Pelvic inflammatory disease                    | N70, N73, N74                                                                                     |
| Perforated/bleeding ulcer                      | K25.0–K25.2, K25.4–K25.6, K26.0–K26.2, K26.4–K26.6, K27.0–K27.2, K27.4–K27.6, K280–282, K284–K286 |
| Pyelonephritis                                 | N10, N11, N12, N13.6                                                                              |
| Alcohol-related diseases                       | F10                                                                                               |
| Atrial fibrillation and flutter                | I47.1, I47.9, I49.5, I49.8, I49.9, R00.0, R002, R00.8                                             |
| Constipation                                   | K59.0                                                                                             |
| Fractured proximal femur                       | S72.0, S72.1, S72.2                                                                               |
| Dyspepsia and other stomach function disorders | K30, K21                                                                                          |
| Hypokalemia                                    | E87.6                                                                                             |
| Migraine/acute headache                        | G43, G44.0, G44.1, G44.3, G44.4, G44.8, R51x                                                      |

ICD-10-GM = International Classification of Diseases-, 10<sup>th</sup> Revision – German Modification.

## STROBE Statement—checklist of items that should be included in reports of observational studies

|                              | Item No | Recommendation                                                                                                                                                                                                                                                                                              |
|------------------------------|---------|-------------------------------------------------------------------------------------------------------------------------------------------------------------------------------------------------------------------------------------------------------------------------------------------------------------|
| <b>Title and abstract</b>    | 1       | (a) Indicate the study's design with a commonly used term in the title or the abstract<br><a href="#">Please see line 1-2</a>                                                                                                                                                                               |
|                              |         | (b) Provide in the abstract an informative and balanced summary of what was done and what was found<br><a href="#">Please see page 2 and page 3</a>                                                                                                                                                         |
| <b>Introduction</b>          |         |                                                                                                                                                                                                                                                                                                             |
| Background/rationale         | 2       | Explain the scientific background and rationale for the investigation being reported<br><a href="#">Please see page 4 and page 5</a>                                                                                                                                                                        |
| Objectives                   | 3       | State specific objectives, including any prespecified hypotheses<br><a href="#">Please see lines 94-98</a>                                                                                                                                                                                                  |
| <b>Methods</b>               |         |                                                                                                                                                                                                                                                                                                             |
| Study design                 | 4       | Present key elements of study design early in the paper<br><a href="#">Please see lines 100-108</a>                                                                                                                                                                                                         |
| Setting                      | 5       | Describe the setting, locations, and relevant dates, including periods of recruitment, exposure, follow-up, and data collection<br><a href="#">Please see lines 109-115</a>                                                                                                                                 |
| Participants                 | 6       | <i>Cross-sectional study</i> —Give the eligibility criteria, and the sources and methods of selection of participants<br><a href="#">Please see lines 109-115</a>                                                                                                                                           |
| Variables                    | 7       | Clearly define all outcomes, exposures, predictors, potential confounders, and effect modifiers. Give diagnostic criteria, if applicable<br><a href="#">Please see lines 159-162 for outcomes and exposures</a><br><a href="#">Please see lines 151-153 for potential confounders, and effect modifiers</a> |
| Data sources/<br>measurement | 8*      | For each variable of interest, give sources of data and details of methods of assessment (measurement). Describe comparability of assessment methods if there is more than one group<br><a href="#">Please see lines 134-146</a>                                                                            |
| Bias                         | 9       | Describe any efforts to address potential sources of bias<br><a href="#">Please see lines 151-153</a>                                                                                                                                                                                                       |
| Study size                   | 10      | Explain how the study size was arrived at<br><a href="#">Please see lines 135-136</a>                                                                                                                                                                                                                       |
| Quantitative variables       | 11      | Explain how quantitative variables were handled in the analyses. If applicable, describe which groupings were chosen and why<br><a href="#">Please see lines 150-156</a>                                                                                                                                    |

|    |                     |    |                                                                                             |
|----|---------------------|----|---------------------------------------------------------------------------------------------|
| 1  |                     |    |                                                                                             |
| 2  | Statistical methods | 12 | (a) Describe all statistical methods, including those used to control for confounding       |
| 3  |                     |    | <a href="#">Please see lines 150-156</a>                                                    |
| 4  |                     |    | (b) Describe any methods used to examine subgroups and interactions                         |
| 5  |                     |    | <a href="#">Please see lines 150-156</a>                                                    |
| 6  |                     |    | (c) Explain how missing data were addressed                                                 |
| 7  |                     |    | <a href="#">There were no missing data</a>                                                  |
| 8  |                     |    | (d) <i>Cross-sectional study</i> —If applicable, describe analytical methods taking account |
| 9  |                     |    | of sampling strategy                                                                        |
| 10 |                     |    | <a href="#">n. a. (full census)</a>                                                         |
| 11 |                     |    | (e) Describe any sensitivity analyses                                                       |
| 12 |                     |    | <a href="#">n. a.</a>                                                                       |
| 13 |                     |    |                                                                                             |
| 14 |                     |    |                                                                                             |
| 15 |                     |    |                                                                                             |

|    |                  |     |                                                                                                                                                                                                              |
|----|------------------|-----|--------------------------------------------------------------------------------------------------------------------------------------------------------------------------------------------------------------|
| 16 | <b>Results</b>   |     |                                                                                                                                                                                                              |
| 17 | <b>Results</b>   |     |                                                                                                                                                                                                              |
| 18 | Participants     | 13* | (a) Report numbers of individuals at each stage of study—eg numbers potentially eligible, examined for eligibility, confirmed eligible, included in the study, completing follow-up, and analysed            |
| 19 |                  |     | <a href="#">Please see lines 174-177</a>                                                                                                                                                                     |
| 20 |                  |     | (b) Give reasons for non-participation at each stage                                                                                                                                                         |
| 21 |                  |     | <a href="#">n. a.</a>                                                                                                                                                                                        |
| 22 |                  |     | (c) Consider use of a flow diagram                                                                                                                                                                           |
| 23 |                  |     | <a href="#">Flow diagram not needed since non-complex sample finding</a>                                                                                                                                     |
| 24 | Descriptive data | 14* | (a) Give characteristics of study participants (eg demographic, clinical, social) and information on exposures and potential confounders                                                                     |
| 25 |                  |     | <a href="#">Please see lines 181-189</a>                                                                                                                                                                     |
| 26 |                  |     | (b) Indicate number of participants with missing data for each variable of interest                                                                                                                          |
| 27 |                  |     | <a href="#">There were no missing data</a>                                                                                                                                                                   |
| 28 |                  |     | <i>Cross-sectional study</i> —Report numbers of outcome events or summary measures                                                                                                                           |
| 29 |                  |     | <a href="#">Please see lines 193-201</a>                                                                                                                                                                     |
| 30 | Main results     | 16  | (a) Give unadjusted estimates and, if applicable, confounder-adjusted estimates and their precision (eg, 95% confidence interval). Make clear which confounders were adjusted for and why they were included |
| 31 |                  |     | <a href="#">Please see lines 204-206 and lines 207-216</a>                                                                                                                                                   |
| 32 |                  |     | (b) Report category boundaries when continuous variables were categorized                                                                                                                                    |
| 33 |                  |     | <a href="#">Age: 0-110 years</a>                                                                                                                                                                             |
| 34 |                  |     | <a href="#">Charlson-Index: 0-20</a>                                                                                                                                                                         |
| 35 |                  |     | <a href="#">Level of care: 0-5</a>                                                                                                                                                                           |
| 36 |                  |     | (c) If relevant, consider translating estimates of relative risk into absolute risk for a meaningful time period                                                                                             |
| 37 |                  |     | <a href="#">Please see lines 204-216</a>                                                                                                                                                                     |
| 38 | Other analyses   | 17  | Report other analyses done—eg analyses of subgroups and interactions, and sensitivity analyses                                                                                                               |
| 39 |                  |     | <a href="#">n. a.</a>                                                                                                                                                                                        |

|    |                   |    |                                                          |
|----|-------------------|----|----------------------------------------------------------|
| 40 | <b>Discussion</b> |    |                                                          |
| 41 | Key results       | 18 | Summarise key results with reference to study objectives |



1  
2  
3  
4  
5  
6  
7  
8  
9  
10  
11  
12  
13

|                  |    |                                                                                                                                                                                                                        |
|------------------|----|------------------------------------------------------------------------------------------------------------------------------------------------------------------------------------------------------------------------|
|                  |    | <a href="#">Please see lines 226-237</a>                                                                                                                                                                               |
| Limitations      | 19 | Discuss limitations of the study, taking into account sources of potential bias or imprecision. Discuss both direction and magnitude of any potential bias<br><a href="#">Please see lines 39-47 and lines 230-237</a> |
| Interpretation   | 20 | Give a cautious overall interpretation of results considering objectives, limitations, multiplicity of analyses, results from similar studies, and other relevant evidence<br><a href="#">Please see pages 12-15</a>   |
| Generalisability | 21 | Discuss the generalisability (external validity) of the study results<br><a href="#">Please see pages 15-16</a>                                                                                                        |

14 **Other information**

15  
16  
17  
18  
19

|         |    |                                                                                                                                                                                                           |
|---------|----|-----------------------------------------------------------------------------------------------------------------------------------------------------------------------------------------------------------|
| Funding | 22 | Give the source of funding and the role of the funders for the present study and, if applicable, for the original study on which the present article is based<br><a href="#">Please see lines 331-332</a> |
|---------|----|-----------------------------------------------------------------------------------------------------------------------------------------------------------------------------------------------------------|

20 \*Give information separately for cases and controls in case-control studies and, if applicable, for exposed and unexposed  
21 groups in cohort and cross-sectional studies.  
22

23  
24 **Note:** An Explanation and Elaboration article discusses each checklist item and gives methodological background and  
25 published examples of transparent reporting. The STROBE checklist is best used in conjunction with this article (freely  
26 available on the Web sites of PLoS Medicine at <http://www.plosmedicine.org/>, Annals of Internal Medicine at  
27 <http://www.annals.org/>, and Epidemiology at <http://www.epidem.com/>). Information on the STROBE Initiative is available  
28 at [www.strobe-statement.org](http://www.strobe-statement.org).  
29  
30  
31  
32  
33  
34  
35  
36  
37  
38  
39  
40  
41  
42  
43  
44  
45  
46  
47  
48  
49  
50  
51  
52  
53  
54  
55  
56  
57  
58  
59  
60
